1 **Conserved cell-lineage controlled epigenetic regulation in human and mouse**

2 **glioblastoma stem cells determines functionally distinct subgroups**

3

4 Xi Lu<sup>1,6</sup>, Naga Prathyusha Maturi<sup>2,6</sup>, Malin Jarvius<sup>3</sup>, Linxuan Zhao<sup>1</sup>, Yuan Xie<sup>2,4</sup>, E-Jean

5 Tan<sup>2,5</sup>, Pengwei Xing<sup>1</sup>, Mårten Fryknäs<sup>3</sup>, Lene Uhrbom<sup>2,7\*</sup>, Xingqi Chen<sup>1,7\*</sup>

6

7 <sup>1</sup>Department of Immunology, Genetics and Pathology, Uppsala University, SE-75108

8 Uppsala, Sweden

9 <sup>2</sup>Department of Immunology, Genetics and Pathology, Uppsala University and Science for

10 Life Laboratory, Rudbeck Laboratory, SE-75185 Uppsala, Sweden

11 <sup>3</sup>Department of Medical Sciences, Cancer Pharmacology and Computational Medicine,

12 Uppsala University and Science for Life Laboratory, SE-75185 Uppsala, Sweden

13 <sup>4</sup>Current address: Shaanxi Normal University, College of Life Sciences, Xi'an, 710119, China

14 <sup>5</sup>Current address: Department of Organismal Biology, Norbyvägen 18A, SE-75236 Uppsala

15 <sup>6</sup>Co-first authors

16 <sup>7</sup>Co-senior authors

17 \*Correspondence: [xingqi.chen@igp.uu.se](mailto:xingqi.chen@igp.uu.se) (X.C.), [lene.uhrbom@igp.uu.se](mailto:lene.uhrbom@igp.uu.se) (L.U.)

18 **Abstract:**

19 There is ample support for developmental regulation of glioblastoma stem cells (GSCs). To  
20 examine how cell lineage controls GSC function we have performed a cross-species  
21 epigenome analysis of mouse and human GSC cultures. We have analyzed and compared  
22 the chromatin-accessibility landscape of nine mouse GSC cultures of defined cell of origin  
23 and 60 patient-derived GSC cultures by assay for transposase-accessible chromatin using  
24 sequencing (ATAC-seq). This uncovered a variability of both mouse and human GSC  
25 cultures that was different from transcriptome analysis and better at predicting functional  
26 subgroups. In both species the chromatin accessibility-guided clusters were predominantly  
27 determined by distal regulatory element (DRE) regions, displayed contrasting sets of  
28 transcription factor binding motifs, and exhibited different functional and drug-response  
29 properties. Cross-species analysis of DRE regions in accessible chromatin revealed  
30 conserved epigenetic regulation of mouse and human GSCs. Human ATAC-seq data  
31 produced three distinct clusters with significant overlap to our previous mouse cell of origin-  
32 based stratification, where two of the clusters displayed significantly different patient survival.  
33 We conclude that epigenetic regulation of GSCs primarily is dictated by developmental origin  
34 which controls key GSC properties and affects therapeutic response.

35

36 **Introduction:**

37 Glioblastoma (GBM) is one of the most aggressive cancers and the most frequent and  
38 lethal primary malignant brain tumor <sup>1</sup>. Standard therapy of care includes maximal-safe  
39 surgical resection, concomitant chemo- and radiotherapy and adjuvant chemotherapy, yet  
40 the two-year survival is 18.5% <sup>1</sup>. Treatment-resistance is explained by extensive genetic  
41 and epigenetic tumor cell heterogeneity of GBM, both with regard to inter-tumor  
42 heterogeneity <sup>2-4</sup>, and intra-tumor heterogeneity at different regions <sup>5</sup> and in individual cells  
43 <sup>6-9</sup>. Large efforts have been done to converge GBM heterogeneity into biologically and  
44 clinically relevant subgroups of GBM. Transcriptome-based stratifications have produced  
45 three major isocitrate dehydrogenases 1 and 2 (*IDH1* and *IDH2*) wildtype (wt) GBM  
46 subtypes: proneural (PN), classical (CL), mesenchymal (MS) <sup>2,10,11</sup>. Studies of patient-  
47 derived GSC cultures, clonal derivatives and single cells have shown the presence of a PN  
48 to MS differentiation axis with plasticity of the states <sup>8,12,13</sup>, and a comprehensive GBM  
49 single cell analysis has uncovered additional and dynamic cellular states in GBM tumors <sup>7</sup>.  
50 The GBM epigenome has been most frequently analyzed by DNA methylation profiling <sup>3,4,14</sup>  
51 and methylomes have proven prognostically more useful than transcriptomes to predict  
52 patient survival <sup>3,4</sup>, demonstrating the importance of understanding of the GBM epigenome.  
53 The active chromatin landscape of GBM has been investigated with chromatin  
54 immunoprecipitation sequencing (ChIP-seq) of acetylated lysine 27 on histone H3  
55 (H3K27ac) in a collection of primary tumors and GSC cultures <sup>15</sup>, and by the assay for  
56 transposase-accessible chromatin using sequencing (ATAC-seq) <sup>8,16,17</sup>, which have  
57 uncovered subgroups of GBM suggested to be regulated by different sets of transcription  
58 factors (TFs).  
59  
60 Several studies have implied a connection between GBM molecular subgroups and  
61 developmental origin <sup>2,18</sup>. Methylation profiling has proven particularly useful to connect  
62 primary tumors with their tissue of origin <sup>19</sup> and has been used to separate GBM with higher  
63 resolution than gene expression <sup>4,20</sup>. We have shown by experimental modeling of GBM

64 that developmental state and age of the cell of origin could affect its vulnerability to GBM  
65 development <sup>21</sup>, and that it shaped the phenotype of the resulting GBM stem cells (GSCs)  
66 <sup>21,22</sup>. Tumors were induced by the same oncogenic events in different mouse cell lineages  
67 which produced contrasting tumor cell phenotypes with regard to malignancy and drug  
68 sensitivity, where a more differentiated origin promoted a less tumorigenic but more drug  
69 resistant mouse GSC (mGSC) phenotype <sup>22</sup>. Through a cross-species GSC-based  
70 stratification approach applying the mouse cell of origin (MCO) gene signature of  
71 differentially expressed genes on a large collection of human GSC cultures, we found that  
72 developmental origin could be used to stratify functionally distinct groups of patient-derived  
73 GSC cultures <sup>22</sup>. A recent similar cross-species approach has further corroborated the  
74 importance of cell lineage origin in GBM <sup>23</sup>. In all this has demonstrated that inter-tumor  
75 heterogeneity to a large extent is shaped by the intrinsic properties of the GBM cell of origin  
76 which result in highly dynamic GSCs that basically evade all current therapies. To  
77 understand how cell lineage regulates these important GSC properties we performed a  
78 cross-species epigenome analysis.

79

80 We have analyzed the chromatin accessibility landscape of 9 mGSC cultures of defined  
81 developmental origin and 60 IDH wild-type human GSC (hGSC) cultures with high  
82 sensitivity ATAC-seq <sup>24</sup>. We have related the results to a range of molecular and functional  
83 data and show that genome-wide chromatin accessibility is a better predictor of GSC  
84 phenotype and survival than transcriptome in both mouse and human cells. Cross-species  
85 analyses supported the subgroups to be cell lineage controlled and showed a conservation  
86 of enriched TF motifs of the differential accessible chromatin regions. Our work also  
87 highlights the value of using mouse models of different cell lineages to obtain relevant  
88 experimental coverage of GBM inter-patient heterogeneity.

89

90 **Results**

91 **Chromatin accessibility in mouse GSCs of different origin predict self-renewal and**  
92 **tumorigenicity**

93 First, we performed ATAC-seq analysis of nine previously established mGSC cultures  
94 derived from different cell lineages but induced by the same oncogenic drivers along with  
95 one NSC culture from each mouse strain <sup>22</sup> (**Figure 1a, Table S1**). The GSC cultures  
96 originated from mouse GBMs induced in adult *tv-a* transgenic mice (*G/tv-a;Arf<sup>-/-</sup>*, *N/tv-a;Arf<sup>-/-</sup>*  
97 *-* and *C/tv-a;Arf<sup>-/-</sup>*) by RCAS-PDGFB, where the cell of origin had been deduced to be a  
98 neural stem cell (NSC)-like cell in *G/tv-a* mice, an astrocyte precursor cell (APC)-like cell in  
99 *N/tv-a* mice and an oligodendrocyte precursor cell (OPC)-like cell in *C/tv-a* mice <sup>22</sup>. The  
100 ATAC-seq data from all samples was determined to be of high quality based on analyses of  
101 enrichment of sequence reads at transcription start sites (TSS), fraction of reads in peaks  
102 (FRiP) and reproducibility (**Figure 1b and Supplementary Fig. 1a, 1b**). This was also  
103 supported by the differential chromatin accessibility at the leucine-rich repeat-containing G-  
104 protein coupled receptor 5 (*Lgr5*), Adenylyl cyclase type 2 (*Adcy2*), and 2',3'-Cyclic-  
105 nucleotide 3'-phosphodiesterase (*Cnp*) loci (**Figure 1c**). *Lgr5* and *Adcy2* are included in the  
106 MCO gene signature <sup>22</sup>, *Lgr5* as a marker of NSC-like origin cultures and *Adcy2* as marker of  
107 APC-like origin cultures. CNP expression was a prerequisite for tumor initiation in OPC-like  
108 cells of *C/tv-a;Arf<sup>-/-</sup>* mice, and although the CNP protein cannot be detected in these tumors  
109 or mGSC cultures, the pronounced open chromatin corroborated their OPC origin. Thus, the  
110 ATAC-seq profiles from all mGSC cultures accurately captured cell lineage distinctions of the  
111 mGSC cultures.

112

113 Previous principal component analysis (PCA) analysis of gene expression array data from  
114 the mGSC cultures had shown a clear separation based on developmental origin <sup>22</sup>. PCA  
115 analysis of ATAC-seq data did not reproduce the cell of origin groups (**Supplementary Fig.**  
116 **1c**). Neither did consensus clustering (**Supplementary Fig. 1d**) nor non-negative matrix  
117 factorization (NMF) analysis (**Supplementary Fig. 1d, 1e**) of the ATAC-seq data, which  
118 made us conclude that the global chromatin accessibility within each cell of origin group had

119 a greater variability compared with gene expression. All analyses showed a clear separation  
120 between NSCs and GSCs, and both NMF and consensus clustering divided the mGSC  
121 cultures into three clusters named A, B and C (**Figure 1d and Supplementary Fig. 1d**). The  
122 most distinctive differences between the clusters were that all NSC-like origin GSC cultures  
123 were in cluster A or B while the majority of APC-like and OPC-like origin GSC cultures were  
124 in cluster C.

125

126 To understand if the ATAC-seq clusters could be related to functional properties of the cells,  
127 we first analyzed self-renewal, a key GSC function. There were significant differences in  
128 sphere-forming ability between ATAC-seq clusters A and B compared to C, respectively  
129 (**Figure 1e**), while there were no differences for the cell of origin groups (**Figure 1f**). We re-  
130 grouped previously generated in vivo data<sup>22</sup> using the ATAC-seq clusters and found, in line  
131 with the sphere data, significantly longer survival for mice injected with cluster C mGSC  
132 cultures compared to the other two clusters (**Figure 1g**). Notably, all mice that were alive at  
133 the endpoint of the experiment were found in cluster C. We also re-analyzed the drug  
134 response data<sup>22</sup> and found that cluster C cultures grouped together and were overall more  
135 drug-resistant (**Figure 1h**). Taken together, we could conclude that chromatin accessibility  
136 could better predict self-renewal, tumorigenicity and drug resistance of mGSC cultures  
137 compared to the cell of origin groups. In concordance with the NMF analysis (**Figure 1d**) the  
138 functional analyses showed that cluster A and B were highly similar, so based on this we  
139 merged the ATAC-seq peaks for cluster A and B (AB) in the following analyses.

140

141 To investigate the underlying molecular regulation of the ATAC-seq clusters, first, we  
142 identified the differentially enriched ATAC peaks between cluster AB compared to cluster C  
143 (Fold change (FC) >2, false discovery rate (FDR) <0.05) (**Supplementary Fig. 1f, Table S2**).  
144 This produced 2553 differential peaks in cluster AB, and 1232 differential peaks in cluster C.  
145 Genomic annotation showed that 87% of the differential peaks were from non-promoter  
146 regions, termed distal regulatory elements (DREs, >3 Kbp but <500 Kbp of TSS). Next, we

147 performed TF motif enrichment analysis from the differential regions to understand the  
148 regulation of the mGSC ATAC clusters (**Figure 1i**). The dominant motifs in cluster AB were  
149 basic leucine zipper domain (bZIP) motifs, in particular of the AP-1 family (ATF1, ATF2,  
150 ATF3, ATF7, FOSL2, JUNB, JUND). AP-1 TFs play important roles in responses to  
151 extracellular stimuli, have strong connections with cancer <sup>25</sup> and have been reported to be  
152 overexpressed in patient GBM samples <sup>26</sup>. In addition to bZIP motifs we also found e.g.  
153 BRN2 (encoded by *Pou3f2*) which is part of a core set of TFs essential for GBM growth <sup>27,28</sup>.  
154 In cluster C the majority of enriched TF motifs belonged to the basic helix-loop-helix (bHLH,  
155 e.g. ASCL1, ATOH1, TCF3, KLF10, NEUROD1, TWIST) or homeobox (SIX1, SIX2, SIX4)  
156 families. These are in general associated with developmental and proneural processes often  
157 promoting a more differentiated phenotype. Several studies have also shown a connection  
158 with GBM where e.g. SIX1, SOX9 and TLX, have been connected with stemness and  
159 proliferation of GBM cells <sup>29-31</sup>. To further analyze TF regulation we performed TF footprint  
160 analysis of differential ATAC peaks, a computational method to predict TF binding (**Figure 1j**  
161 **and Supplementary Fig. 1g**). This showed a significantly higher occupancy at ATF3,  
162 FOSL2 and CREB motifs in cluster AB (**Figure 1j**), and significantly higher occupancy of  
163 ASCL1, TCF3, SIX1, SIX2, SIX4, SLUG and TWIST motifs in cluster C (**Figure 1j and**  
164 **Supplementary Fig. 1g**). Other TF motifs that were clearly different (non-significant)  
165 between the groups were BRN2 and NEUROD1 (**Supplementary Fig. 1g**). These analyses  
166 provided a molecular basis for the functionally different mGSC ATAC clusters and suggested  
167 the presence of different transcriptional regulation.

168

169 Lastly, to characterize the mGSC ATAC clusters we used the available gene expression  
170 array data <sup>22</sup> and performed gene set enrichment analysis (GSEA) to compare cluster AB to  
171 cluster C. We found that the "Wong embryonic stem cell core" gene set, showed enrichment  
172 for cluster AB and inverse enrichment for cluster C (**Supplementary Fig. 1h**), in agreement  
173 with the different self-renewal capacities of the cultures. There was no difference for the

174 "Beier glioma stem cell up" gene set (**Supplementary Fig. 1i**), consistent with the cancer  
175 stem cell phenotype of all mGSC cultures.

176

177 In summary we found that chromatin accessibility profiling is a more accurate molecular  
178 method to detect heterogeneity among mGSC cultures of the same origin compared to  
179 transcriptome profiling. This heterogeneity could also more precisely predict self-renewal,  
180 malignancy and drug response capacities of the cultures, which showed the importance of  
181 cell lineage-regulation of GSCs. The fact that a large proportion of the differential chromatin  
182 accessible regions were DREs enriched with distinct sets of TF motifs provided additional  
183 support for discrete regulation of the mGSC clusters.

184

#### 185 **Heterogeneous chromatin accessibility across 60 patient-derived GSC cultures**

186 Next, we investigated the chromatin accessibility landscape in our local human GBM cell  
187 culture (HGCC) biobank<sup>22,32,33</sup>. We performed ATAC-seq on 60 patient-derived IDH wildtype  
188 GSC cultures (hGSC) (**Figure 2a, Table S1**). Again, we applied established and stringent  
189 criteria for the ATAC-seq data processing and could show high Pearson correlation  
190 coefficient (0.8-0.98) for technical replicates, TSS enrichment scores above 3.8, and a FRiP  
191 of all 60 samples above 10%<sup>34</sup> (**Supplementary Fig. 2a-c**). We performed a saturation  
192 analysis using random sampling non-linear regression to analyze the fraction of all predicted  
193 accessible chromatin regions that we could expect to detect with 60 cultures (**Figure 2b**).

194 This showed that our sample size was large enough and that all predicted regions of  
195 accessible chromatin would be detected with 47 cultures. In total, we had captured 323526  
196 ATAC peaks from our hGSC cohort. To obtain an overview of the global chromatin  
197 accessibility landscape of the samples we identified all unique chromatin-accessible regions  
198 in the entire data and calculated for each region the number of samples it was present in  
199 (**Figure 2c**). A large proportion (25.4%) of ATAC peaks was only detected in one hGSC  
200 culture, and just 1.5% of the accessible regions were common to all 60 cultures.

201 Nonetheless, unique chromatin-regions showed increased openness the more frequently



202 they were present in the samples (**Supplementary Fig. 2d**). SOX2 showed an overall high  
203 chromatin accessibility across the cohort (**Figure 2d**) in line with previous data showing  
204 SOX2 expression in all HGCC cultures investigated<sup>35</sup>. Yet, individual cultures showed a  
205 clear variability in chromatin openness of this loci (**Figure 2d**). Inter-culture heterogeneity  
206 was further sustained by analyses of promoter (-1 Kbp to +100 bp of TSS) and DRE regions  
207 of GSC meta module genes<sup>7</sup> and MCO genes<sup>22</sup> (**Figure 2e and Supplementary Fig. 2e**).  
208 Also structural genomic annotation of the ATAC data showed a clear variation in chromatin-  
209 openness among the 60 cultures (**Figure 2f**). Taken together, this demonstrated that our  
210 cohort of 60 patient-derived GSC cultures displayed a highly heterogeneous chromatin  
211 accessibility landscape.

212

### 213 **Chromatin-accessibility robustly identify three clusters of patient-derived GSC** 214 **cultures**

215 To identify unifying features of the hGSC cohort we performed NMF analysis on the ATAC-  
216 seq data, which produced three clusters: ATAC60-C1 (n=22), ATAC60-C2 (n=16) and  
217 ATAC60-C3 (n=22) (**Supplementary Fig. 3a, 3b, Table S1**). A large part of the HGCC  
218 cultures had previously been classified based on gene expression according to The Cancer  
219 Genome Atlas (TCGA) subtypes<sup>35</sup> and by using the MCO gene signature (MCO 1-3)<sup>22</sup>. To  
220 compare the ATAC-seq clusters with the TCGA and MCO classifications we excluded hGSC  
221 samples lacking such information and re-analyzed 50 samples with NMF. This produced,  
222 again, three clusters: ATAC50 C1 (n=19), ATAC50 C2 (n=14) and ATAC50 C3 (n=17)  
223 (**Figure 3a and Supplementary Fig. 3c**). Comparing ATAC50 to ATAC60 clusters showed  
224 that only three samples had changed cluster in ATAC50 (**Supplementary Fig. 3d, Table**  
225 **S1**), which indicated a robustness of the chromatin accessibility-based clustering. From  
226 hereon we only refer to the ATAC50 classification.

227

228 When comparing the ATAC50 clusters with the TCGA subtypes there was little overlap  
229 (**Figure 3b**). The majority of PN and CL cultures were in C1 while MS cultures basically were

230 divided between C2 and C3. Comparing to MCO showed a higher degree of overlap (**Figure**  
231 **3c**), likely reflecting the relation between developmental origin and epigenetic state of GSC.  
232

233 Next, we extracted the unique chromatin-accessible regions for each ATAC50 cluster with  
234 DESeq2 (FC >2, FDR <0.001, peak average intensity >30, and coefficient of variance <0.2)  
235 (**Figure 3d**). By this we identified 4023 regions in C1, 5547 in C2 and 949 in C3 (**Figure 3d**,  
236 **Table S3**). The genomic features of all chromatin-accessible regions from each ATAC50  
237 cluster were annotated using the chromatin state discovery and characterization software  
238 (ChromHMM)<sup>36</sup> (**Figures 3E and Supplementary Fig. 3e**). There was a diverse distribution  
239 of chromatin states with some marked differences between ATAC50 clusters. C1 had the  
240 largest proportion of active promoter regions (H3K4me3 and H3K27ac), C2 occupied a  
241 higher proportion of active regions (H3K27ac), and C3 had a higher frequency of weak  
242 enhancer regions (H3K4me1). Common to all three clusters was that the combined  
243 proportion of strong and weak enhancer regions constituted the biggest proportion of  
244 chromatin states, clearly larger compared to the distribution in the whole ATAC-seq data  
245 (**Figure 3e**). This indicated, as in mGSCs, that DRE regions were central in defining the  
246 ATAC50 clusters. To test our hypothesis, we performed Pearson correlation hierarchal  
247 clustering of all ATAC peaks, of DRE regions only, and of promoter regions only (**Figure 3f**).  
248 All ATAC peaks and DRE peaks displayed similar dynamic range of chromatin openness  
249 and cluster patterns, while the dynamic range of promoter regions was smaller which  
250 supported our assumption. NMF clustering of DRE ATAC peaks (**Figure 3g and**  
251 **Supplementary Fig. 3f**) produced almost identical clusters as ATAC50 (**Figure 3h**).  
252 Clustering promoter regions resulted in two clusters (**Supplementary Fig. 3g, 3h**) that were  
253 entirely different and non-overlapping to ATAC50 (**Supplementary Fig. 3i**). Collectively, our  
254 analyses showed that chromatin accessibility could robustly stratify hGSC cultures and  
255 clusters were predominantly dictated by the DRE regions. The high correspondence of the  
256 ATAC50 clusters with the MCO stratification implied an important role of cell lineage-  
257 controlled gene regulation of human GSC cultures.

258

259 **ATAC50 clusters are phenotypically distinct**

260 To phenotypically characterize the ATAC50 clusters we first used hGSC gene expression  
261 array data <sup>22</sup> and analyzed the 256 GSC meta module genes <sup>7</sup> across the 50 cultures  
262 (**Figure 4a and Supplementary Fig. 4**). While only 53 genes showed a significant  
263 difference between the clusters (**Figure 4b**) there were clear differences comparing global  
264 meta module gene expression (**Figure 4a**). C1 showed significantly higher expression of  
265 NPC1, NPC2 and OPC genes compared to both C2 and C3, significantly higher expression  
266 of AC genes compared to C2, and significantly lower expression of MES genes compared to  
267 both C2 and C3. Thus, C1 and C2 were always at the end of the spectrum with C3 in the  
268 middle. Notably, C3 showed significantly higher expression of NPC1, OPC and AC genes  
269 and significantly lower expression of MES2 genes compared to C2. This suggested that  
270 ATAC50 clusters were separated along a gradient of GSC states with C1 being progenitor  
271 cell-like, C2 being mesenchymal-like and C3 being intermediate.

272

273 Next, we analyzed chromatin openness of meta module genes in promoter regions (**Figure**  
274 **4c**) and DRE regions (**Figure 4d**). The openness of DRE regions was significantly different  
275 between all clusters in all meta modules whereas promoter regions showed less distinct  
276 differences for NPC1, NPC2, OPC and AC meta modules and were non-significant for MES1  
277 and MES2. This is in line with the dominant role of DRE regions to separate the ATAC50  
278 clusters (**Figure 3f**).

279

280 Of the meta module genes with significant different gene expression (**Figure 4b**) the majority  
281 (39) were higher expressed in C1 and belonged to the NPC1, NPC2, OPC and AC modules.  
282 C2 showed a higher expression of some MES1 and MES2 genes, and C3 cultures displayed  
283 higher expression of a few NPC1, NPC2 and AC genes. To investigate the chromatin  
284 openness of DRE regions of these genes we first linked all human ATAC DRE regions with  
285 their nearest gene through a peak-to-gene linking prediction analysis <sup>34</sup> (**Supplementary Fig.**

286 **5a, Table S4**). This was used to compare ATAC peaks of the significant genes (**Figure 4b**)  
287 between clusters (**Table S4**) which showed that 47% (25 of 53) had significantly different  
288 chromatin accessibility in DRE regions (**Figure 4e, Table S4**), compared to only 7 of 53 for  
289 promoter regions, supporting the importance of DREs in regulating ATAC50 clusters.

290

291 To investigate underlying mechanisms controlling the ATAC50 clusters, we performed TF  
292 motif enrichment analysis on significantly different chromatin-accessible regions. Of the top-  
293 50 most variable TFs motifs the majority were bZIP (n=15) or bHLH (n=15) motifs  
294 (**Supplementary Fig. 5b, Table S5**). There was a clear and inverse enrichment when  
295 comparing ATAC50 C1 and C2, with bHLH motifs being most common in C1 and bZIP  
296 motifs being most common in C2. GSCs maintained in stem cell media have been shown to  
297 enrich for bHLH TFs while serum media enriched for bZIP TFs<sup>27</sup> corroborating different  
298 state identities of C1 and C2 cultures. To find distinctive features of each cluster we  
299 extracted the significantly enriched cluster-specific TF motifs (**Figure 4f, Table S6**). This  
300 identified 64 uniquely enriched motifs in C1, 51 in C2, and 13 in C3. Among the TFs in C1  
301 many were regulators of neural development with strong connections to GBM such as  
302 TCF12<sup>37-40</sup>, ASCL1<sup>41</sup>, OLIG2<sup>42</sup> and SOX9<sup>43</sup>. Dominant TF motifs enriched in C2 were AP-  
303 1 complex motifs of the JUN, FOS, ATF and MAF families and motifs of the MAF dimerizing  
304 proteins NRF2, BACH1 and BACH2, which have also been associated with cancer  
305 progression and metastasis<sup>25</sup> and are plausible candidates to regulate the mesenchymal  
306 features of C2 cultures. Since C3 was intermediate to C1 and C2, there were fewer uniquely  
307 enriched TF motifs in this cluster. Among them were GBM-associated FOXM1, FOXA1 and  
308 SOX3 (**Figure 4f**)<sup>37-40,44</sup>. When analyzing the relationship of TF motif openness and TF gene  
309 expression we found a positive correlation for several TFs (**Figure 4g**) which strengthened  
310 their involvement in shaping the cluster phenotypes. We also analyzed TF occupancy by  
311 footprint analysis of differential peaks (**Figure 4h and Supplementary Fig. 5c**). We found  
312 that ATAC50 C1 showed significantly higher occupancy of OLIG2, TCF12, ASCL1 and  
313 NEUROD1 compared to C2 and C3, while C2 and C3 showed significantly higher occupancy

314 for NF-E2, JUNB and FOSL2 compared to C1. Among the C3-uniquely enriched TF motifs  
315 there were no significant footprints, but among the top-50 variable TF motifs TEAD3 showed  
316 significantly higher occupancy for C3 compared to C1 (**Figure 4h**). In all, the TF motif  
317 enrichment, TF gene expression and TF occupancy analyses confirmed the phenotypic  
318 differences and revealed distinct epigenetic regulation of the ATAC50 clusters.

319

### 320 **ATAC50 classification produce functional separation of hGSC cultures**

321 Since epigenetic clusters of mGSCs efficiently distinguished functional groups, we asked  
322 whether ATAC50 clusters also would. We investigated essential GSC properties in 16 C1, 8  
323 C2 and 13 C3 cultures, of which the majority had overlapping MCO and ATAC50  
324 classifications (**Table S1**). We first performed consecutive sphere-forming assays under  
325 clonal conditions (**Figure 5a**). C1 cultures displayed the highest sphere-forming ability while  
326 there was no significant difference between C2 and C3 cultures, although C3 cultures  
327 produced a higher average number of spheres. Extreme limiting dilution assay (ELDA)  
328 showed that C1 cultures had the highest self-renewal capacity but there was also a  
329 difference between C2 and C3 (**Figure 5b**). A similar result was found for cell proliferation  
330 where C1 had a significantly higher BrdU incorporation compared to both C2 and C3  
331 cultures, with C3 showing intermediate proliferation (**Figure 5c**). Migration was analyzed  
332 with the spheroid collagen gel invasion assay. Here we found that C2 cultures were  
333 significantly more invasive than C1 and C3 cultures (**Figure 5d**). In all, these functional  
334 characteristics were in accordance with the stem and progenitor cell-like molecular  
335 phenotype of C1 cultures, the mesenchymal-like phenotype of C2 culture and the mixed  
336 molecular phenotype of the C3 cultures.

337

338 We also analyzed the drug response phenotype of 11 C1, 7 C2 and 10 C3 cultures by  
339 measuring cell viability after 72 hours exposure to a collection of 28 anti-cancer drugs at 7  
340 different concentrations (**Figure 5e-g, Table S7**). This produced dose-response curves that  
341 were converted to area under the curve (AUC) measures that were compared pair-wise

342 between clusters. There was a clear overall higher sensitivity of C1 cultures to the  
343 compounds compared to both C2 (**Figure 5e**) and C3 (**Figure 5f**) cultures. All drugs that  
344 produced a significantly different response between C1 and C2 or C3 cultures were more  
345 effective in C1 cultures. These comparisons identified two compounds as particularly  
346 efficient for C1 cultures, Melflufen (alkylating) and PD173074 (FGFR1 inhibitor). When  
347 comparing C2 to C3 cultures, C3 cultures were clearly, overall, more sensitive to the tested  
348 drugs (**Figure 5g**). However, C3 cultures showed a significantly higher resistance to two  
349 drugs, 5-azacytidine and 6-thioguanine, compared to both C1 and C2 cultures (**Figure 5f**  
350 **and 5g**). The distinct drug response phenotypes of the ATAC50 clusters suggested that cell  
351 lineage dependencies are important to account for when developing therapeutic strategies  
352 for GBM.

353

#### 354 **ATAC50 clusters exhibit different mouse and patient survival**

355 Orthotopic tumor growth is a defining capacity of cancer stem cells. We used in vivo data, in  
356 total 322 intracranially injected immune-deficient mice, from published<sup>22,32,33,35</sup> and  
357 unpublished experiments, and included only individuals that had been killed because of  
358 disease symptoms before the experimental endpoint (**Table S8**). When grouping mice  
359 according to the ATAC50 clusters we found a significant difference in survival between all  
360 groups with C1 being most aggressive (**Figure 6a**). We also analyzed survival of GBM  
361 patients from whom hGSC cultures had been derived (**Figure 6b-d**). We first grouped  
362 patients according to the widely used TCGA classification (**Figure 6b**), which showed no  
363 difference between the groups. Nor did the ATAC50 clusters (**Figure 6c**), although the  
364 curves seemed slightly more separated. We also analyzed the MCO clusters because of the  
365 high degree of overlap with ATAC50 (**Figure 6d**). This showed a significant survival  
366 difference between MCO2 and MCO3 patients. When we combined the MCO and ATAC50  
367 classifications, i.e. included only those patients whom showed an overlap for both, the  
368 significant survival benefit of C3 patients compared to C2 remained (**Figure 6e**). The  
369 differences between mouse and patient survival can have many explanations, e.g. clonal

370 selection of GSCs, but we believe that one important factor was the effect of therapy in the  
371 patients. Although there were no significant differences between clusters when comparing  
372 drug-response scores for temozolomide we noted that C3 cultures were always most  
373 sensitive to this drug compared to C1 and C2 (**Figure 5e-g**). When we analyzed the dose-  
374 response curves for temozolomide we found that C2 cultures were most resistant and C3  
375 cultures most sensitive at all concentrations, with significant difference between C2 and C3  
376 at the four highest doses (**Figure 6f**). Thus, the elevated tumorigenic properties of C1 GSCs  
377 may in patients have been counteracted by their higher sensitivity to temozolomide, and vice  
378 versa for C2 GSCs. The significantly improved survival of C3 patients could be explained by  
379 C3 cultures being least malignant (**Figure 5a-d and Figure 6a**) and most temozolomide-  
380 sensitive (**Figure 6f**). This showed that epigenetic and cell lineage-based classifications  
381 could be valuable to predict GBM patient survival, likely because of their ability distinguish  
382 key tumor cell phenotypes.

383

#### 384 **Cross-species analyses reveal mouse cell of origin prediction of hGSC ATAC clusters**

385 At last, we performed cross-species analyses of chromatin accessibility in mGSC and hGSC  
386 cultures. The high overlap of the ATAC50 clusters with the cell lineage-based MCO  
387 stratification (**Figure 3c and Figure 7a**) suggested an important role of developmental  
388 regulation. We started by investigating if the chromatin landscape of the MCO genes could  
389 guide the ATAC50 clusters. Of the 196 MCO genes<sup>22</sup> we used 166 human homologues for  
390 which the ATAC-seq peaks of promoter regions were extracted and analyzed by NMF  
391 (**Supplementary Fig. 6a, 6b**). This produced a poor overlap with the ATAC50 clusters  
392 (**Figure 7b**), consistent with the importance of DRE regions (**Figure 3h**). Next we  
393 investigated the DRE regions of the MCO genes through the peak-to-gene linking prediction  
394 analysis (**Table S4**). The MCO human homologue genes were annotated to 786 ATAC  
395 peaks that were analyzed by NMF (**Supplementary Fig. 6c, 6d**), which showed a higher  
396 concordance with ATAC50 (**Figure 7c**) compared to promoter-guided clusters (**Figure 7b**)  
397 but lower than the MCO stratification (**Figure 7a**). Finally, we used cluster-specific mouse



398 ATAC peaks (n=3785, **Table S2**) that were annotated to 2456 mouse genes, converted to  
399 2128 human homologue genes of which 1298 were present in the peaks-to-genes data and  
400 could be linked to 8187 human ATAC peaks. The DREs of these peaks were used in NMF  
401 (**Supplementary Fig. 6e, 6f**) which produced clusters that, surprisingly, showed a very high  
402 agreement with the ATAC50 clusters (**Figure 7d**). As reference we compared this to 1000  
403 NMF analyses of 8187 randomly selected ATAC peaks from the peaks-to-genes data which  
404 did not reproduce the ATAC50 clusters (**Supplementary Fig. 6g**). To investigate the basis  
405 for the overlap of mouse-dictated human ATAC50 clusters, we compared enriched TF motifs  
406 in the 3785 mouse ATAC peaks to those of the corresponding 8187 human ATAC peaks.  
407 This showed an 80% overlap in the top-10 significantly enriched TF motifs in mouse and  
408 human ATAC data (**Figure 7e, 7f**), and all overlapping motifs were of the AP-1 family. As a  
409 reference, we compared this to a 1000 times repeated control experiment where enriched  
410 TF motifs in 3785 randomly selected mouse ATAC peaks and their corresponding human  
411 ATAC peaks were compared (**Supplementary Fig. 6h**). The TF motif overlap extended from  
412 0 to 6 with an average overlap of 22.3% (standard deviation =13.4%) and overlapping TF  
413 motifs were not restricted to the AP-1 family.

414

415 In summary, this showed that the chromatin accessibility based cross-species analysis with  
416 high precision could predict the ATAC50 clusters, with complete accuracy for C1 and with  
417 slight deviations for C2 and C3, consistent with the more similar phenotypes of C2 and C3.  
418 TFs motif analysis displayed common TFs regulatory mechanisms of mouse and human  
419 GSCs, which provide strong support for the presence of conserved cell of origin-determined  
420 epigenetic regulation of GBM.

421

## 422 **Discussion**

423 The contribution of developmental regulation in GBM biology and GSC function remains to a  
424 large extent to be deciphered. We have addressed it by performing genome-wide analysis of



425 chromatin-accessibility in mouse and human GSC cultures. Mouse GSC cultures were  
426 derived from GBMs of different cell lineages<sup>22</sup>, and within each cell lineage group we found  
427 a variability in chromatin openness which we had not observed with gene expression. One  
428 explanation could be that it reflected a differentiation state variability of the targeted cell of  
429 origin since chromatin accessibility have been shown to precede changes in gene  
430 expression<sup>45</sup>. Strikingly, the chromatin accessibility variability was shown to better determine  
431 essential GSC functions.

432

433 The ATAC-seq data divided both mouse and human cells in molecularly and functionally  
434 distinct groups, and these groups were mainly determined by the chromatin state of DREs  
435 and regulated by contrasting sets of TFs. Our finding of three hGSC ATAC clusters aligned  
436 with recent ATAC-seq analyses of human GBM cells and GSC cultures from independent  
437 cohorts<sup>8,16</sup> supporting our non-linear regression analysis which predicted that our cohort  
438 would be large enough to capture the spectrum of GBM inter-patient heterogeneity.  
439 Expression of GSC state markers<sup>7</sup> and analyses of TF circuits showed that C1 cultures  
440 were glial stem and progenitor cell-like, C2 profoundly mesenchymal-like and C3 had an  
441 intermediate phenotype with mostly astrocytic and mesenchymal traits. ATAC50 clusters  
442 were also functionally well-defined where C1 cultures were most self-renewing, proliferative  
443 and tumorigenic, C2 cultures most invasive and temozolomide-resistant, and C3 cultures  
444 least tumorigenic and temozolomide-resistant. The precision of chromatin accessibility to  
445 separate TCGA mesenchymal subtype cultures into two groups with significantly different  
446 survival emphasized the importance of understanding the epigenetic regulation of the  
447 ATAC50 clusters.

448

449 The considerable overlap of the MCO classification with the ATAC50 clusters implied a cell  
450 lineage controlled regulation of hGSCs. This was corroborated by the cross-species analysis  
451 where chromatin accessibility of cluster-specific DRE regions from mGSCs could almost  
452 completely predict the ATAC50 clusters. The 80% overlap of top-10 enriched TF motifs in

453 the cross-species comparison of accessible chromatin regions provided strong support for a  
454 conserved epigenetic cell lineage regulation of GBM. Our cross-species analysis also  
455 validated the PDGF-driven mouse GBM models as highly relevant, representing the breadth  
456 of developmental regulation present in our collection of 50 patient-derived GSC cultures. The  
457 fact that one oncogenic driver (PDGFRA activation) could reproduce the epigenetic  
458 heterogeneity of human GBM was in line with results from the comprehensive single cell  
459 RNA-seq analysis of human GBM <sup>7</sup> where multiple cellular states were shown to be present  
460 in all investigated tumors, while state distributions were proposed to be dictated by certain  
461 genetic factors such as PDGFRA. Taken together, this would argue for that GBM epigenetic  
462 heterogeneity is mainly be the consequence cell of origin-inherited developmental regulation  
463 which in turn provide the basis for possible GSC states, and that GBM driver mutations  
464 determine the state transition dynamics.

465

466 We show the power of a chromatin accessibility-based functional classification of GSCs.  
467 Continued work to identify the key regulatory elements in the DREs dictating the different  
468 properties and common features of the epigenetic clusters, and to validate key TF circuits  
469 regulating GSC states by perturbation strategies will be crucial to pinpoint therapeutic targets.  
470 Our analysis of chromatin accessibility in mGSCs and hGSCs has revealed a species  
471 conservation of the GBM epigenome and demonstrated the importance of cell lineage  
472 diversity for accurate in vivo modeling of inter-patient heterogeneity.

473

474

475 **Author contributions**

476 L.U. and X.C. conceptualized, designed and supervised the study. N.P.M. planned,  
477 performed and analyzed most experiments. M.J., L.Z., Y.X., E-J.T. and X.C. performed  
478 additional experiments. X.L. performed all computational analyses with help from P.X. M.F.  
479 provided technical and material support. L.U. and X.C. wrote the manuscript with input from  
480 all co-authors.

481

482 **Acknowledgements**

483 We thank members of the Chen and Uhrbom laboratories for scientific discussions. This  
484 work was supported by the Swedish Research Council (2016-06794, 2017-02074 to X.C.,  
485 2018-02906 to L.U.), the Swedish Cancer Society (15 0877, 18 0763 to L.U.), Beijer  
486 Foundation (to X.C.), Jeansson's Foundation (to X.C.), Petrus och Augusta Hedlunds  
487 Stiftelse (to X.C.), Göran Gustafsson's prize to younger researchers (to X.C.), Vleugel  
488 Foundation (to X.C.), and Uppsala University (to X.C.).

489 **Competing Financial Interests statements**

490 The authors declare no competing financial interests.

491

492 **Availability of the data**

493 The accession number for mGSC and hGSC ATAC sequencing data generated for this  
494 study is GSE163853.

495

496 **References:**

- 497 1. Ostrom, Q.T. *et al.* CBTRUS Statistical Report: Primary Brain and Other Central  
498 Nervous System Tumors Diagnosed in the United States in 2012-2016. *Neuro Oncol*  
499 **21**, v1-v100 (2019).
- 500 2. Verhaak, R.G. *et al.* Integrated genomic analysis identifies clinically relevant subtypes  
501 of glioblastoma characterized by abnormalities in PDGFRA, IDH1, EGFR, and NF1.  
502 *Cancer Cell* **17**, 98-110 (2010).
- 503 3. Brennan, C.W. *et al.* The somatic genomic landscape of glioblastoma. *Cell* **155**, 462-  
504 77 (2013).
- 505 4. Ceccarelli, M. *et al.* Molecular Profiling Reveals Biologically Discrete Subsets and  
506 Pathways of Progression in Diffuse Glioma. *Cell* **164**, 550-63 (2016).
- 507 5. Sottoriva, A. *et al.* Intratumor heterogeneity in human glioblastoma reflects cancer  
508 evolutionary dynamics. *Proc Natl Acad Sci U S A* **110**, 4009-14 (2013).

- 509 6. Meyer, M. *et al.* Single cell-derived clonal analysis of human glioblastoma links  
510 functional and genomic heterogeneity. *Proc Natl Acad Sci U S A* **112**, 851-6 (2015).
- 511 7. Neftel, C. *et al.* An Integrative Model of Cellular States, Plasticity, and Genetics for  
512 Glioblastoma. *Cell* **178**, 835-849 e21 (2019).
- 513 8. Wang, L. *et al.* The Phenotypes of Proliferating Glioblastoma Cells Reside on a Single  
514 Axis of Variation. *Cancer Discov* **9**, 1708-1719 (2019).
- 515 9. Patel, A.P. *et al.* Single-cell RNA-seq highlights intratumoral heterogeneity in primary  
516 glioblastoma. *Science* **344**, 1396-401 (2014).
- 517 10. Phillips, H.S. *et al.* Molecular subclasses of high-grade glioma predict prognosis,  
518 delineate a pattern of disease progression, and resemble stages in neurogenesis.  
519 *Cancer Cell* **9**, 157-73 (2006).
- 520 11. Wang, Q. *et al.* Tumor Evolution of Glioma-Intrinsic Gene Expression Subtypes  
521 Associates with Immunological Changes in the Microenvironment. *Cancer Cell* **32**, 42-  
522 56 e6 (2017).
- 523 12. Bhat, K.P.L. *et al.* Mesenchymal differentiation mediated by NF-kappaB promotes  
524 radiation resistance in glioblastoma. *Cancer Cell* **24**, 331-46 (2013).
- 525 13. Segerman, A. *et al.* Clonal Variation in Drug and Radiation Response among Glioma-  
526 Initiating Cells Is Linked to Proneural-Mesenchymal Transition. *Cell Reports* **17**, 2994-  
527 3009 (2016).
- 528 14. Klughammer, J. *et al.* The DNA methylation landscape of glioblastoma disease  
529 progression shows extensive heterogeneity in time and space. *Nature Medicine* **24**,  
530 1611-+ (2018).
- 531 15. Mack, S.C. *et al.* Chromatin landscapes reveal developmentally encoded  
532 transcriptional states that define human glioblastoma. *Journal of Experimental*  
533 *Medicine* **216**, 1071-1090 (2019).
- 534 16. Guilhamon, P. *et al.* Single-cell chromatin accessibility profiling of glioblastoma  
535 identifies an Invasive cancer stem cell population associated with lower survival. *Elife*  
536 **10**(2021).
- 537 17. Tome-Garcia, J. *et al.* Analysis of chromatin accessibility uncovers TEAD1 as a  
538 regulator of migration in human glioblastoma. *Nature Communications* **9**(2018).
- 539 18. Sturm, D. *et al.* Hotspot mutations in H3F3A and IDH1 define distinct epigenetic and  
540 biological subgroups of glioblastoma. *Cancer Cell* **22**, 425-37 (2012).
- 541 19. Fernandez, A.F. *et al.* A DNA methylation fingerprint of 1628 human samples.  
542 *Genome Res* **22**, 407-19 (2012).
- 543 20. Capper, D. *et al.* DNA methylation-based classification of central nervous system  
544 tumours. *Nature* **555**, 469-474 (2018).
- 545 21. Sreedharan, S. *et al.* Mouse Models of Pediatric Supratentorial High-grade Glioma  
546 Reveal How Cell-of-Origin Influences Tumor Development and Phenotype. *Cancer*  
547 *Research* **77**, 802-812 (2017).
- 548 22. Jiang, Y. *et al.* Glioblastoma Cell Malignancy and Drug Sensitivity Are Affected by the  
549 Cell of Origin. *Cell Rep* **18**, 977-990 (2017).
- 550 23. Wang, Z. *et al.* Cell Lineage-Based Stratification for Glioblastoma. *Cancer Cell* **38**, 366-  
551 379 e8 (2020).
- 552 24. Chen, X. *et al.* ATAC-seq reveals the accessible genome by transposase-mediated  
553 imaging and sequencing. *Nat Methods* **13**, 1013-1020 (2016).
- 554 25. Eferl, R. & Wagner, E.F. AP-1: a double-edged sword in tumorigenesis. *Nat Rev*  
555 *Cancer* **3**, 859-68 (2003).

- 556 26. Bhardwaj, R., Suzuki, A., Leland, P., Joshi, B.H. & Puri, R.K. Identification of a novel  
557 role of IL-13Ralpha2 in human Glioblastoma multiforme: interleukin-13 mediates  
558 signal transduction through AP-1 pathway. *J Transl Med* **16**, 369 (2018).
- 559 27. Suva, M.L. *et al.* Reconstructing and reprogramming the tumor-propagating potential  
560 of glioblastoma stem-like cells. *Cell* **157**, 580-94 (2014).
- 561 28. Lodato, M.A. *et al.* SOX2 co-occupies distal enhancer elements with distinct POU  
562 factors in ESCs and NPCs to specify cell state. *PLoS Genet* **9**, e1003288 (2013).
- 563 29. De Lope, C. *et al.* SIX1 represses senescence and promotes SOX2-mediated cellular  
564 plasticity during tumorigenesis. *Sci Rep* **9**, 1412 (2019).
- 565 30. Sabelstrom, H. *et al.* Driving Neuronal Differentiation through Reversal of an ERK1/2-  
566 miR-124-SOX9 Axis Abrogates Glioblastoma Aggressiveness. *Cell Reports* **28**, 2064-+  
567 (2019).
- 568 31. Hubert, C.G. *et al.* A Three-Dimensional Organoid Culture System Derived from  
569 Human Glioblastomas Recapitulates the Hypoxic Gradients and Cancer Stem Cell  
570 Heterogeneity of Tumors Found In Vivo. *Cancer Research* **76**, 2465-2477 (2016).
- 571 32. Xie, Y. *et al.* The Human Glioblastoma Cell Culture Resource: Validated Cell Models  
572 Representing All Molecular Subtypes. *Ebiomedicine* **2**, 1351-1363 (2015).
- 573 33. Maturi, N.P. *et al.* A molecularly distinct subset of glioblastoma requires serum-  
574 containing media to establish sustainable bona fide glioblastoma stem cell cultures.  
575 *Glia* **68**, 1228-1240 (2020).
- 576 34. Corces, M.R. *et al.* The chromatin accessibility landscape of primary human cancers.  
577 *Science* **362**(2018).
- 578 35. Xie, Y. *et al.* LGR5 promotes tumorigenicity and invasion of glioblastoma stem-like  
579 cells and is a potential therapeutic target for a subset of glioblastoma patients.  
580 *Journal of Pathology* **247**, 228-240 (2019).
- 581 36. Ernst, J. & Kellis, M. ChromHMM: automating chromatin-state discovery and  
582 characterization. *Nature Methods* **9**, 215-216 (2012).
- 583 37. Liu, M. *et al.* FoxM1B is overexpressed in human glioblastomas and critically  
584 regulates the tumorigenicity of glioma cells. *Cancer Res* **66**, 3593-602 (2006).
- 585 38. Dai, B. *et al.* Aberrant FoxM1B expression increases matrix metalloproteinase-2  
586 transcription and enhances the invasion of glioma cells. *Oncogene* **26**, 6212-9 (2007).
- 587 39. Zhang, Y. *et al.* FoxM1B transcriptionally regulates vascular endothelial growth factor  
588 expression and promotes the angiogenesis and growth of glioma cells. *Cancer Res* **68**,  
589 8733-42 (2008).
- 590 40. Zhang, N. *et al.* FoxM1 promotes beta-catenin nuclear localization and controls Wnt  
591 target-gene expression and glioma tumorigenesis. *Cancer Cell* **20**, 427-42 (2011).
- 592 41. Somasundaram, K. *et al.* Upregulation of ASCL1 and inhibition of Notch signaling  
593 pathway characterize progressive astrocytoma. *Oncogene* **24**, 7073-83 (2005).
- 594 42. Ligon, K.L. *et al.* The oligodendroglial lineage marker OLIG2 is universally expressed  
595 in diffuse gliomas. *Journal of Neuropathology and Experimental Neurology* **63**, 499-  
596 509 (2004).
- 597 43. Hiraoka, K. *et al.* SOX9-mediated upregulation of LGR5 is important for glioblastoma  
598 tumorigenicity. *Biochemical and Biophysical Research Communications* **460**, 216-221  
599 (2015).
- 600 44. Wang, L. *et al.* Forkhead-box A1 transcription factor is a novel adverse prognosis  
601 marker in human glioma. *Journal of Clinical Neuroscience* **20**, 654-658 (2013).

- 602 45. Inoue, F., Kreimer, A., Ashuach, T., Ahituv, N. & Yosef, N. Identification and Massively  
603 Parallel Characterization of Regulatory Elements Driving Neural Induction. *Cell Stem*  
604 *Cell* **25**, 713-727 e10 (2019).  
605

606 **Supplementary Figures 1-6 are in the separated files.**

607 **Table S1-8 are in the separated file.**

608

609 **Methods:**

610 **ATAC-seq**

611 Human GSCs, mouse GSCs and mouse NSCs were fixed with 1% formaldehyde (Thermo  
612 Fisher scientific, 28906) for 10 min and quenched with 0.125 M glycine for 5 min at room  
613 temperature. After the fixation, ATAC-seq was performed as previous described<sup>1</sup>. Cells were  
614 counted and 50 000 cells were used per ATAC-seq reaction. The transposition reaction  
615 followed the normal ATAC-seq protocol. After transposition, a reverse crosslink solution  
616 (final concentration 50mM Tris-Cl PH 8.0 (Invitrogen, 15568-025), 1mM EDTA (Invitrogen,  
617 AM9290G), 1% SDS (Invitrogen, 15553-035), 0.2M NaCl (Invitrogen, AM9759) and 5ng/ul  
618 proteinase K (Thermo Scientific, EO0491)) was added up to 200  $\mu$ l. The mixture was  
619 incubated at 65 °C with 1200 rpm shaking in a heat block overnight, then purified with  
620 MinElute PCR Purification kit (QIAGEN, 28004) and eluted in 10  $\mu$ l Qiagen EB elution buffer.  
621 Sequencing libraries were prepared following the original ATAC-seq protocol<sup>2</sup>. The  
622 sequencing was performed on Illumina NovaSeq 6000, and at least 20 million paired-end  
623 sequencing reads were generated for each ATAC-seq library.

624

625 **ATAC-seq data processing**

626 After the Adapter sequence trimming, the ATAC-seq sequencing reads were mapped to  
627 genome hg19 or mm9 using bowtie2<sup>3</sup>. Mapped paired reads were corrected for the Tn5  
628 cleavage position with shifting +4/-5 bp depending on the strand of reads. All mapped reads  
629 were extended to 50 bp centered by Tn5 offset. The PCR duplication were removed using  
630 Picard (<http://broadinstitute.github.io/picard/>) and sequencing reads from chromosome M  
631 were removed. The Peak calling of each ATAC-seq library was performed with MASC2<sup>4</sup>  
632 with parameters -f BED, -g hs, -q 0.01, --nomodel, --shift 0. Peaks were merged into matrix  
633 with bedtools merge<sup>5</sup>. Raw reads within peaks were normalized using EdgeR's cpm<sup>6</sup>. Log  
634 transformation were applied on these normalized peaks to calculate the pearson correlation  
635 among duplicates. Unique ATAC peaks for hGSC ATAC clusters were selected using  
636 DESeq2<sup>7</sup>, with cutoff : p value < 0.01, FDR < 0.01, log2 fold change > 1, peak average  
637 intensity > 30, and coefficient of variance < 0.2. Mouse differential ATAC-seq peaks using  
638 ATAC new cluster: cluster AB and cluster C, were identified following the principle that two  
639 clusters were compared with each other with parameter log2(fold change) > 1, false  
640 discovery rate <0.05. The ATAC-seq saturation analysis from human GSC was performed  
641 by randomly sampling samples and successively calculating the number of peaks identified  
642 within the number of samples. The self-starting non-linear mode has been used to predicate



643 the saturation point. For ATAC-seq peak visualization, Washu Epigenome Browser was  
644 used to visualize these presentative peak regions from mouse NSC, mGSC and hGSC.

645

646 Non-linear model:

$$P(x) = a + b * e^{cx+d}$$

647 Where P(x) represents predicted numbers of peaks, x corresponds the actual number of  
648 peaks, a,b,c and d represent the parameters for self-starting simulation

649

650 To summarize the chromatin accessibility signal per gene, the accessibility of the regions (no  
651 further than the window -1000 to +100bp from a transcriptional start site) were defined as  
652 promoter regions and the elements (located more than 3 Kbp from a TSS and no further  
653 than 500 Kbp) were represented as distal regulatory elements (DRE). The genomic  
654 annotation of ATAC-seq was performed with seven genomic features: 3' UTR, 5' UTR, exon,  
655 intergenic region, intron, TSS and TTS using the ChIPseeker<sup>8</sup>.

656

#### 657 **NMF cluster analysis of human and mouse GSC and mouse NSC ATAC-seq**

658 The Non-negative matrix factorization (NMF) method<sup>9</sup> was used to cluster Human GSC  
659 ATAC-seq and mouse NSC and GSC ATAC-seq with nsNMF<sup>10</sup>. In brief, ATAC-seq peaks  
660 were ranked according to their variance from high to low. The cophenetic correlation score  
661 was calculated with cluster number 2 to 8, and used to determine the cluster numbers  
662 following the standard method<sup>9</sup>. Top 68000 ATAC-seq peaks (40%) from mGSC, and top  
663 70000 (20%) ATAC-seq peaks from hGSC were used to build NMF clusters.

664

#### 665 **Genomic segmentation analysis for the Human GSC ATAC-seq**

666 The chromatin-state discovery and genome annotation for the ATAC-seq peaks from the  
667 human GSC ATAC-seq peaks was performed with ChromHMM<sup>11</sup> by downloading the data  
668 from following dataset: GSE119755 (H3K27ac ChIP-seq); GSE121601 (H3K27ac and CTCF  
669 ChIP-seq); GSE92458 (H3K4me1 and H3K27ac ChIP-seq); GSE74557 (H3K27me3 and  
670 H3K4me3 ChIP-seq). In total, 7 chromatin status referred to Epigenomic Roadmap  
671 Consortium were defined: active promoter (H3K27ac and H3K4me3 together), active region  
672 (H3K27ac alone), inactive regions (H3K27me3 alone), insulator (CTCF), strong enhancer  
673 (H3K4me1 and H3K27ac together), weak enhancer (H3K4me1 alone) and no signal, were  
674 used to characterize the human GSC ATAC-seq peaks.

675

#### 676 **Transcription factor motif enrichment for cluster-specific ATAC-seq peaks**

677 Specific motifs enrichments in mGSC or hGSC cluster calculated by Deseq2<sup>7</sup> was explored  
678 here. Homer<sup>12</sup> vertebrate database and the coordinates of our cluster-specific peak sets



679 were used to calculate motif occurrences<sup>13</sup>. TF accessibility deviation value for each sample  
680 could be obtained. The variability of the TF motifs across the whole sample set was  
681 determined by calculating the standard deviation of these. TF deviation with the threshold  
682 variability close to 1 was not significantly variable. TFs whose deviation score was positively  
683 correlated to one cluster was selected to represent each cluster based on the average of  
684 deviation score of each cluster. In order to identify the top 50 variable TFs, TFs were ranked  
685 based on their variabilities. After removing non-variable TFs, the z-score of deviation of each  
686 TF was visualized in a heatmap. Considering raw motif enrichment is not enough to predict  
687 the activity of TF, TF deviation and gene expression were combined for identifying these  
688 active TFs with the threshold p-value < 0.05 as potential mediators of the observed motif  
689 enrichment.

690

### 691 **ATAC-seq peak to gene linkage predictions**

692 Putative linkage between ATAC-seq peaks and gene expression were predicted with a  
693 correlation-based approach. First, ATAC-seq peaks were annotated to the nearest genes  
694 within +/-0.5 Mbp but +/- 3 Kbp of TSS. For each pair, the Pearson correlation between the  
695 ATAC-seq peak accessibility and the gene expression level was calculated. Next, the mean  
696 and standard deviation for these correlations were calculated to represent nonspecific  
697 correlation. Then, multiple correction was performed using Benjamini-Hochberg procedure to  
698 adjust these p-values. At last, only pairs with False Discovery Rate (FDR) < 0.05 were kept.

699

### 700 **TFs Footprint analysis for cluster-specific ATAC-seq peaks**

701 In previous descriptions, Tn5 transposase inserted two adaptors separated by 9bp<sup>14</sup>.  
702 Sequencing reads aligned files in sam format by offsetting +/-5bp for all the reads  
703 depending on the strand of reads. A shifted base sam file converted to bam format and was  
704 sorted by samtools<sup>15</sup>. ATAC-seq reads for each cluster of samples (mGSC ATAC: cluster  
705 AB and cluster C; hGSC ATAC50: C1, C2 and C3) were concatenated and 200 million reads  
706 were randomly selected from cluster and merged into bam files. Then TFs footprint analysis  
707 was performed on cluster-specific regions using HINT-ATAC software. Input motif was  
708 obtained from Homer<sup>12</sup> database on vertebrate. 414 motifs were tested and filtered with p-  
709 value < 0.05. The normalized read counts were centered by the motif sites around 200bp  
710 genomic region for visualizing motif footprints.

711

### 712 **TFs motif enrichment in cross-species analysis**

713 After identifying the unique peaks for cluster AB and cluster C and then doing the genomic  
714 annotation for mouse peaks with ChIPseeker<sup>8</sup>, mouse genes were converted to their  
715 corresponding human gene. Pairs from previous peak-to-gene linking predictions were used

716 to obtain peaks from hGSC genes. NMF method was performed on these hGSC peaks to  
717 guide the new clusters. MCO genes guided hGSC cluster was build following the same  
718 described method. For MCO promoter-guided cluster, after converting MCO gene to their  
719 relative human genes. Only promoter regions from these human genes were used to build  
720 NMF clusters. Finally, HOMER<sup>12</sup> was to calculate the transcriptional factor motif enrichment  
721 from mGSC ATAC-seq cluster-specific peaks and mGSC ATAC guided hGSC peaks.

722

### 723 **Sphere formation assay**

724 Established cultures from mGSC and hGSC cultures were made into single-cell suspensions  
725 by dissociating them with Acutase (Invitrogen, A1110501) and TrypLE (Thermofisher,  
726 12563011) respectively. For primary sphere formation, 1000 cells/well were seeded in 8  
727 replicates in a 24 well low attachment plates. After 7 days, the number of primary spheres  
728 formed for each culture were counted. For hGSCs, the primary spheres were dissociated  
729 and seeded 1000 cells/well in 8 replicates again for secondary sphere formation and  
730 counted after 7 days. Similar procedure was followed to seed and count the tertiary sphere  
731 formation of hGSC cultures.

732

### 733 **Proliferation analysis**

734 Cells from hGSC cultures ( $5 \times 10^3$  per well) were seeded (day 0) on laminin-coated  
735 coverslips in a 24 well plate using serum-free medium. The next day (day 1)  $1\mu\text{g}/\mu\text{l}$  of BrdU  
736 (Sigma, B5002) was added to each well for 16 hours before they were fixed with 4%  
737 formaldehyde (Histolab, 02176). After fixation cells were washed with PBS and  
738 permeabilized in 2M HCl for 20 minutes, followed by the washing again with PBS. Cells on  
739 the coverslips were permeabilised in 0.2% triton X-100 with 3% Bovine serum albumin  
740 (Sigma, A7906) for 5 minutes and washed thrice with PBS. Cells were blocked in 0.2% triton  
741 X-100 solution containing 1% BSA and 5% normal goat serum (DAKO, X0907) for 1 hour.  
742 Primary antibody again BrdU (Abcam, Ab6326) was applied overnight in a humidified  
743 chamber at 4°C. Cells were washed three times with 0.2% Triton X-100 solution for about 5  
744 minutes each time. Secondary antibody incubation was performed for 30-60 minutes in room  
745 temperature with anti-rat Alexa 555 (1:400, Invitrogen, A21434). Lastly cells were washed  
746 three times with 0.2% Triton X-100 solution for about 5 minutes each time and mounted in  
747 Fluoromount (Sigma, F4680) with 0.1% DAPI in it. The stainings were visualised and  
748 quantified under LEICA DMI8 Fluorescent microscope. The experiment was repeated three  
749 times on consecutive passages for all the cultures.

750

### 751 **Extreme limiting dilution assay**

752 Cells from hGSC cultures were dissociated and made into single-cell suspensions in serum-  
753 free medium. Cells were seeded in a 96-well low attachments plates (CLS3474-24EA,  
754 Sigma) with the seeding density ranging from 100 cells to 1 cell per well, with 10 replicates  
755 per condition. After 7-10 days, number of wells without spheres for each cell density were  
756 counted. Number of cells required to form one sphere per well was calculated by  
757 extrapolating the values of x-intercept for each culture and plotted using PRISM 7 software.  
758 The experiment was repeated three times for all cultures.

759

#### 760 **Invasion assay**

761 Cell spheres obtained from hGSC cultures by seeding 100/50 cells per well in ELDA  
762 experiment were used to measure the invasive capacity for each culture. Collagen gel matrix  
763 was prepared and spheres were transferred into the collagen gel matrix sandwich in a 24  
764 well plate as described previously<sup>16</sup>. Pictures were taken after 10 minutes and 24 hours in  
765 Eclipse TS 100 Nikon microscope. Image J 1.52a software was used to measure the  
766 invasion area for each sphere. From each hGSC culture at least 10 spheres were analysed.  
767 The experiment was repeated three times on consecutive passages for all cultures.

768

#### 769 **Drug response analysis in human glioblastoma cell cultures:**

770 A selected panel of 28 anti-cancer compounds were used to measure the drug sensitivity of  
771 hGSC cultures. Cells were seeded, 1000 cells/well in a poly-ornithine (Sigma, P3655) and  
772 laminin (Sigma) coated 384 well plate (Thermo fisher scientific). The following day cells were  
773 exposed to the compounds for 24 hours and were measured for their drug response after 72  
774 hours of treatment. Cell viability was measured by using the non-clonogenic fluorometric  
775 microculture cytotoxicity assay (FMCA). Dose response curve was plotted by calculating the  
776 area under the curve values for each compound in each individual culture. The log<sub>10</sub> fold  
777 change of the average of AUC value between cultures from paired comparison of ATAC-seq  
778 clusters were calculated using wilcoxon test and scatter plot was drawn as described  
779 previously<sup>17</sup>.

780

#### 781 **In vivo xenograft analysis**

782 All animal experiments were performed in accordance with the rules and regulations of  
783 Uppsala University and approved by the local animal ethics committee (C237/12 and  
784 C182/14). Intracranial cell transplantations of human GSC cultures were performed in  
785 neonatal NOD-SCID mice as previously described<sup>16,18-20</sup>. In addition to the published data 60  
786 new mice were included (Table S8). In brief cells were dissociated in TrypLE and  
787 resuspended in DMEM/F12 medium. A volume of 2 µl cell suspension with cells ranging  
788 from 10000 till 200000 was orthotopically injected using a motorized stereotaxic injector

789 (Stoelting CO). The coordinates measured from lambda were: antero-posterior 1.5 mm,  
790 medio-lateral 0.7 mm and dorso-ventral 1.5 mm. Mice were monitored every second day and  
791 euthanized upon symptoms of disease. Only mice that showed disease symptoms before  
792 the endpoint of the experiment were used in the analysis.

793

#### 794 **Quantification and Statistical analysis**

795 Statistical analysis was performed using GraphPad PRISM 7 software or R version 3.4.0.  
796 Figures containing data from multiple repetitions of experiments were presented as mean  $\pm$   
797 SEM. For sphere-formation, ELDA, proliferation and invasion experiments students t-tests  
798 were performed. For mice and patient survival, Log-rank (Mantel-Cox) test was the statistical  
799 method used to calculate the significance in between the groups/clusters. In all the  
800 experiments the statistical significance between the groups were determined with the  
801 following p-values as \* $p < 0.05$ , \*\* $p < 0.01$ , \*\*\* $p < 0.001$ , and \*\*\*\* $p < 0.0001$ .

802

#### 803 **Methods only References**

- 804 1. Chen, X. *et al.* Joint single-cell DNA accessibility and protein epitope profiling reveals  
805 environmental regulation of epigenomic heterogeneity. *Nat Commun* **9**, 4590 (2018).
- 806 2. Buenrostro, J.D., Giresi, P.G., Zaba, L.C., Chang, H.Y. & Greenleaf, W.J. Transposition  
807 of native chromatin for fast and sensitive epigenomic profiling of open chromatin,  
808 DNA-binding proteins and nucleosome position. *Nat Methods* **10**, 1213-8 (2013).
- 809 3. Langmead, B., Trapnell, C., Pop, M. & Salzberg, S.L. Ultrafast and memory-efficient  
810 alignment of short DNA sequences to the human genome. *Genome Biol* **10**, R25  
811 (2009).
- 812 4. Zhang, Y. *et al.* Model-based analysis of ChIP-Seq (MACS). *Genome Biol* **9**, R137  
813 (2008).
- 814 5. Ramirez, F., Dundar, F., Diehl, S., Gruning, B.A. & Manke, T. deepTools: a flexible  
815 platform for exploring deep-sequencing data. *Nucleic Acids Res* **42**, W187-91 (2014).
- 816 6. Robinson, M.D., McCarthy, D.J. & Smyth, G.K. edgeR: a Bioconductor package for  
817 differential expression analysis of digital gene expression data. *Bioinformatics* **26**,  
818 139-40 (2010).
- 819 7. Love, M.I., Huber, W. & Anders, S. Moderated estimation of fold change and  
820 dispersion for RNA-seq data with DESeq2. *Genome Biol* **15**, 550 (2014).
- 821 8. Yu, G., Wang, L.G. & He, Q.Y. ChIPseeker: an R/Bioconductor package for ChIP peak  
822 annotation, comparison and visualization. *Bioinformatics* **31**, 2382-3 (2015).
- 823 9. Brunet, J.P., Tamayo, P., Golub, T.R. & Mesirov, J.P. Metagenes and molecular  
824 pattern discovery using matrix factorization. *Proceedings of the National Academy of  
825 Sciences of the United States of America* **101**, 4164-4169 (2004).
- 826 10. Pascual-Montano, A., Carazo, J.M., Kochi, K., Lehmann, D. & Pascual-Marqui, R.D.  
827 Nonsmooth nonnegative matrix factorization (nsNMF). *IEEE Trans Pattern Anal Mach  
828 Intell* **28**, 403-15 (2006).
- 829 11. Ernst, J. & Kellis, M. Chromatin-state discovery and genome annotation with  
830 ChromHMM. *Nat Protoc* **12**, 2478-2492 (2017).

- 831 12. Heinz, S. *et al.* Simple combinations of lineage-determining transcription factors  
832 prime cis-regulatory elements required for macrophage and B cell identities. *Mol Cell*  
833 **38**, 576-89 (2010).
- 834 13. Schep, A.N., Wu, B., Buenrostro, J.D. & Greenleaf, W.J. chromVAR: inferring  
835 transcription-factor-associated accessibility from single-cell epigenomic data. *Nat*  
836 *Methods* **14**, 975-978 (2017).
- 837 14. Adey, A. *et al.* Rapid, low-input, low-bias construction of shotgun fragment libraries  
838 by high-density in vitro transposition. *Genome Biol* **11**, R119 (2010).
- 839 15. Li, H. *et al.* The Sequence Alignment/Map format and SAMtools. *Bioinformatics* **25**,  
840 2078-9 (2009).
- 841 16. Maturi, N.P. *et al.* A molecularly distinct subset of glioblastoma requires serum-  
842 containing media to establish sustainable bona fide glioblastoma stem cell cultures.  
843 *Glia* **68**, 1228-1240 (2020).
- 844 17. Sreedharan, S. *et al.* Mouse Models of Pediatric Supratentorial High-grade Glioma  
845 Reveal How Cell-of-Origin Influences Tumor Development and Phenotype. *Cancer*  
846 *Research* **77**, 802-812 (2017).
- 847 18. Xie, Y. *et al.* LGR5 promotes tumorigenicity and invasion of glioblastoma stem-like  
848 cells and is a potential therapeutic target for a subset of glioblastoma patients.  
849 *Journal of Pathology* **247**, 228-240 (2019).
- 850 19. Xie, Y. *et al.* The Human Glioblastoma Cell Culture Resource: Validated Cell Models  
851 Representing All Molecular Subtypes. *Ebiomedicine* **2**, 1351-1363 (2015).
- 852 20. Jiang, Y. *et al.* Glioblastoma Cell Malignancy and Drug Sensitivity Are Affected by the  
853 Cell of Origin. *Cell Rep* **18**, 977-990 (2017).  
854

855 **Figure Legends**

856 **Figure 1. Chromatin accessibility in mouse GSCs of different origin predict self-**  
857 **renewal and tumorigenicity**

- 858 (a) Workflow to decode chromatin accessibility in mouse GSC cultures.  
859 (b) Enrichment of ATAC-seq reads at TSS.  
860 (c) Genome browser tracks of ATAC-seq data for *Lgr5*, *Adcy2* and *Cnp* genes.  
861 (d) NMF cluster analysis of mouse ATAC-seq data.  
862 (e) Mouse GSC sphere-forming analysis comparing ATAC clusters. Student's t-test was  
863 performed on all pair-wise comparisons, significant differences are indicated: A versus C, \*\*p  
864 = 0.0049; B versus C, \*\*p = 0.0066.  
865 (f) Mouse GSC sphere-forming analysis comparing cell of origin groups. Student's t-test was  
866 performed on all pair-wise comparisons, there were no significant differences.  
867 (g) Kaplan-Meier survival analysis of glioma-free survival in syngeneic mice injected with  
868 mGSC cultures. Log-rank (Mantel-Cox) test showed significant differences between A and C,  
869 and between B and C, \*\*\*\*p < 0.0001 for both.  
870 (h) Heatmap of drug response scores for nine mouse GSC cultures tested for 26 anti-cancer  
871 drugs.  
872 (i) Heatmap of TF motif enrichment scores in mGSC chromatin accessible sites comparing  
873 cluster AB with C.  
874 (j) Significant TF footprints of enriched TF motifs comparing cluster AB with C. Friedman-  
875 Nemenyi test was performed, p < 0.05 for all.

876

877 **Figure 2. Heterogeneous chromatin accessibility across 60 patient-derived GSC**  
878 **cultures**

- 879 (a) Workflow to decode the chromatin accessibility of 60 patient-derived IDH wildtype GSC  
880 cultures.  
881 (b) Saturation analysis using a non-linear model. Total number of predicted accessible  
882 chromatin regions in GBM (light green line), observed number of accessible chromatin  
883 regions in 60 hGSC samples (dark green line).  
884 (c) Histogram of the distribution of unique ATAC peaks in the cohort.  
885 (d) Genome browser tracks of ATAC-seq signal at *SOX2*. Top panel shows the average  
886 ATAC-seq signal of all 60 samples. Bottom panel shows the ATAC-seq signal from each  
887 individual hGSC culture.  
888 (e) Violin plots of cohort-wide distribution of chromatin accessibility at promoters and DRE  
889 regions of GBM meta module and cell lineage-relevant genes.  
890 (f) Genomic annotation of ATAC peaks in each hGSC sample.

891

892 **Figure 3. Chromatin-accessibility robustly identify three clusters of patient-derived**  
893 **GSC cultures**

- 894 (a) NMF cluster analysis of ATAC-seq data from 50 patient-derived GSC cultures.  
895 (b) Distribution of TCGA subtypes among ATAC50 clusters.  
896 (c) Distribution of MCO subgroups among ATAC50 clusters.  
897 (d) Heatmap of unique ATAC peaks of each ATAC50 cluster.  
898 (e) Genomic annotation of all ATAC peaks in the hGSC cohort and unique ATAC peaks of  
899 each ATAC50 cluster.  
900 (f) Pearson correlation heatmaps of all ATAC peaks (top), ATAC peaks of DREs (middle)  
901 and ATAC peaks of promoters (bottom). Samples are arranged in the same order in all  
902 heatmaps, based on Pearson correlation of all ATAC peaks.  
903 (g) NMF clustering of DRE ATAC peaks from 50 human GSC cultures.  
904 (h) Overlap of ATAC50 clusters with DRE-guided clusters.

905

906 **Figure 4. hGSC ATAC50 clusters are phenotypically distinct**

- 907 (a) Average gene expression of each GSC meta module comparing ATAC50 clusters.  
908 (b) Gene expression of ATAC50 cluster significant meta module genes.  
909 (c) Chromatin accessibility at promoters of GSC meta module genes.  
910 (d) Chromatin accessibility at DREs of GSC meta module genes.  
911 Student's t-test was performed on all pair-wise comparisons in (a), (c) and (d), significant  
912 differences are indicated, \*p < 0.05, \*\*p < 0.01, \*\*\*p < 0.001, \*\*\*\*p < 0.0001.  
913 (e) Genome tracks for *OLIG2*, *NDRG1*, *LBH*.  
914 (f) Heatmap of significantly enriched cluster specific TF motifs.  
915 (g) Scatter plots of TF motif chromatin accessibility (x-axis, normalized chromatin openness)  
916 and TF gene expression (y-axis, microarray data, counts per million reads mapped (CPM))  
917 of significantly enriched TF motifs in (f). *R* = Pearson correlation, *p* calculated by Student's t-  
918 test.  
919 (h) TF footprint analysis of cluster-specific ATAC50 peaks. Friedman-Nemenyi test was  
920 performed, *p* < 0.05 for all.

921

922

923

924

925

926

927

928



929 **Figure 5. ATAC50 classification produce functional separation of hGSC cultures**  
930 (a) Sphere assays comparing ATAC50 clusters. Data show mean  $\pm$  SEM. Student's t-test  
931 was performed on all pair-wise comparisons, significant differences are indicated. Primary  
932 spheres: C1 versus C2, \*\*\*p = 0.0005; C1 versus C3, \*\*p = 0.0013. Secondary spheres: C1  
933 versus C2, \*\*\*\*p < 0.0001; C1 versus C3, \*\*p = 0.0014. Tertiary spheres: C1 versus C2,  
934 \*\*\*\*p < 0.0001; C1 versus C3, \*\*p = 0.0041. n, number of different cell cultures analyzed.  
935 (b) ELDA comparing ATAC50 clusters. Data show mean  $\pm$  SEM. Student's t-test: C1 versus  
936 C2, \*\*\*\*p < 0.0001; C1 versus C3, \*\*p = 0.0021; C2 versus C3, \*p = 0.0169. n, number of  
937 different cell cultures analyzed.  
938 (c) Frequency of BrdU positive cells. Data show mean  $\pm$  SEM. Student's t-test was  
939 performed on all pair-wise comparisons, significant differences are indicated: C1 versus C2,  
940 \*\*\*p = 0.0001; C1 versus C3, \*\*p = 0.0088. n, number of different cell cultures analyzed.  
941 (d) Collagen invasion assay measuring the invaded area at 24 hours. Data show mean  $\pm$   
942 SEM. Student's t-test was performed on all pair-wise comparisons, significant differences  
943 are indicated: C1 versus C2, \*\*p = 0.0072; C2 versus C3, \*\*p = 0.0043. n, number of  
944 different cell cultures analyzed.  
945 (e-g) Volcano plots of pair-wise comparisons of AUC scores in ATAC50 C1 (n=12), C2 (n=7)  
946 and C3 (n=10) cultures to 28 anti-cancer drugs. Red circles indicate significantly different  
947 drug response. n, number of different cell cultures analyzed.  
948 (e) ATAC50 C1 versus C2. Red circles in upper left corner, C1 is more sensitive.  
949 (f) ATAC50 C1 versus C3. Red circles in upper left corner, C1 is more sensitive.  
950 (g) ATAC50 C2 versus C3. Red circles in upper left corner, C2 is more sensitive. Red circles  
951 in upper right corner, C3 is more sensitive.

952

953 **Figure 6. ATAC50 clusters exhibit different mouse and patient survival**

954 (a) Kaplan-Meier analysis of symptom-free survival of intracranially injected immune-  
955 deficient mice (14 C1 cultures, 11 C2 cultures, 9 C3 cultures). Log-rank (Mantel-Cox) test:  
956 C1 versus C2 or C3, \*\*\*\*p < 0.0001; C2 versus C3, \*\*p = 0.0062. n, number of injected mice.  
957 (b-e) Kaplan-Meier analysis of patient survival. Log-rank (Mantel-Cox) test was performed,  
958 significant differences are indicated. n, number of patients.  
959 (b) Patients were divided based on TCGA subtype.  
960 (c) Patients were divided based on ATAC50 clusters.  
961 (d) Patients were divided based on MCO classification. C2 versus C3, \*p = 0.0182.  
962 (e) Patients with overlapping ATAC50 and MCO classifications. C2 versus C3, \*p = 0.0371.  
963 (f) Dose-response curves show cell viability after 72 hours exposure to temozolomide.  
964 Student's t-test was performed on all pair-wise comparisons at all concentrations, significant



965 differences between C2 and C3 are indicated: 62,5 $\mu$ M, \*p = 0.0405; 125  $\mu$ M, \*p = 0.0170;  
966 250 $\mu$ M, \*\*p = 0.0012; 500 $\mu$ M, \*\*p = 0.0027.

967

968 **Figure 7. Cross-species analyses reveal conservation between mouse and human**  
969 **GSC chromatin accessibility**

970 (a-d) Analyses of mouse GSC-guided clustering of human GSCs and their overlap with  
971 ATAC50 clusters.

972 (a) Overlap with MCO stratification (Jiang et al, Cell Rep, 2017).

973 (b) Overlap with MCO promoter-guided ATAC clusters.

974 (c) Overlap with MCO DRE-guided ATAC clusters.

975 (d) Overlap with mGSC cluster-unique ATAC-guided clusters.

976 (e) Ranking of enriched TF motifs in mGSC cluster-specific ATAC peaks. Red circles  
977 indicate top-10 significant motifs.

978 (f) Ranking of enriched TF motifs in the mGSC ATAC-guided hGSC ATAC peaks. Red  
979 circles indicate top-10 significant motifs.

980

981

982

## Figure 1

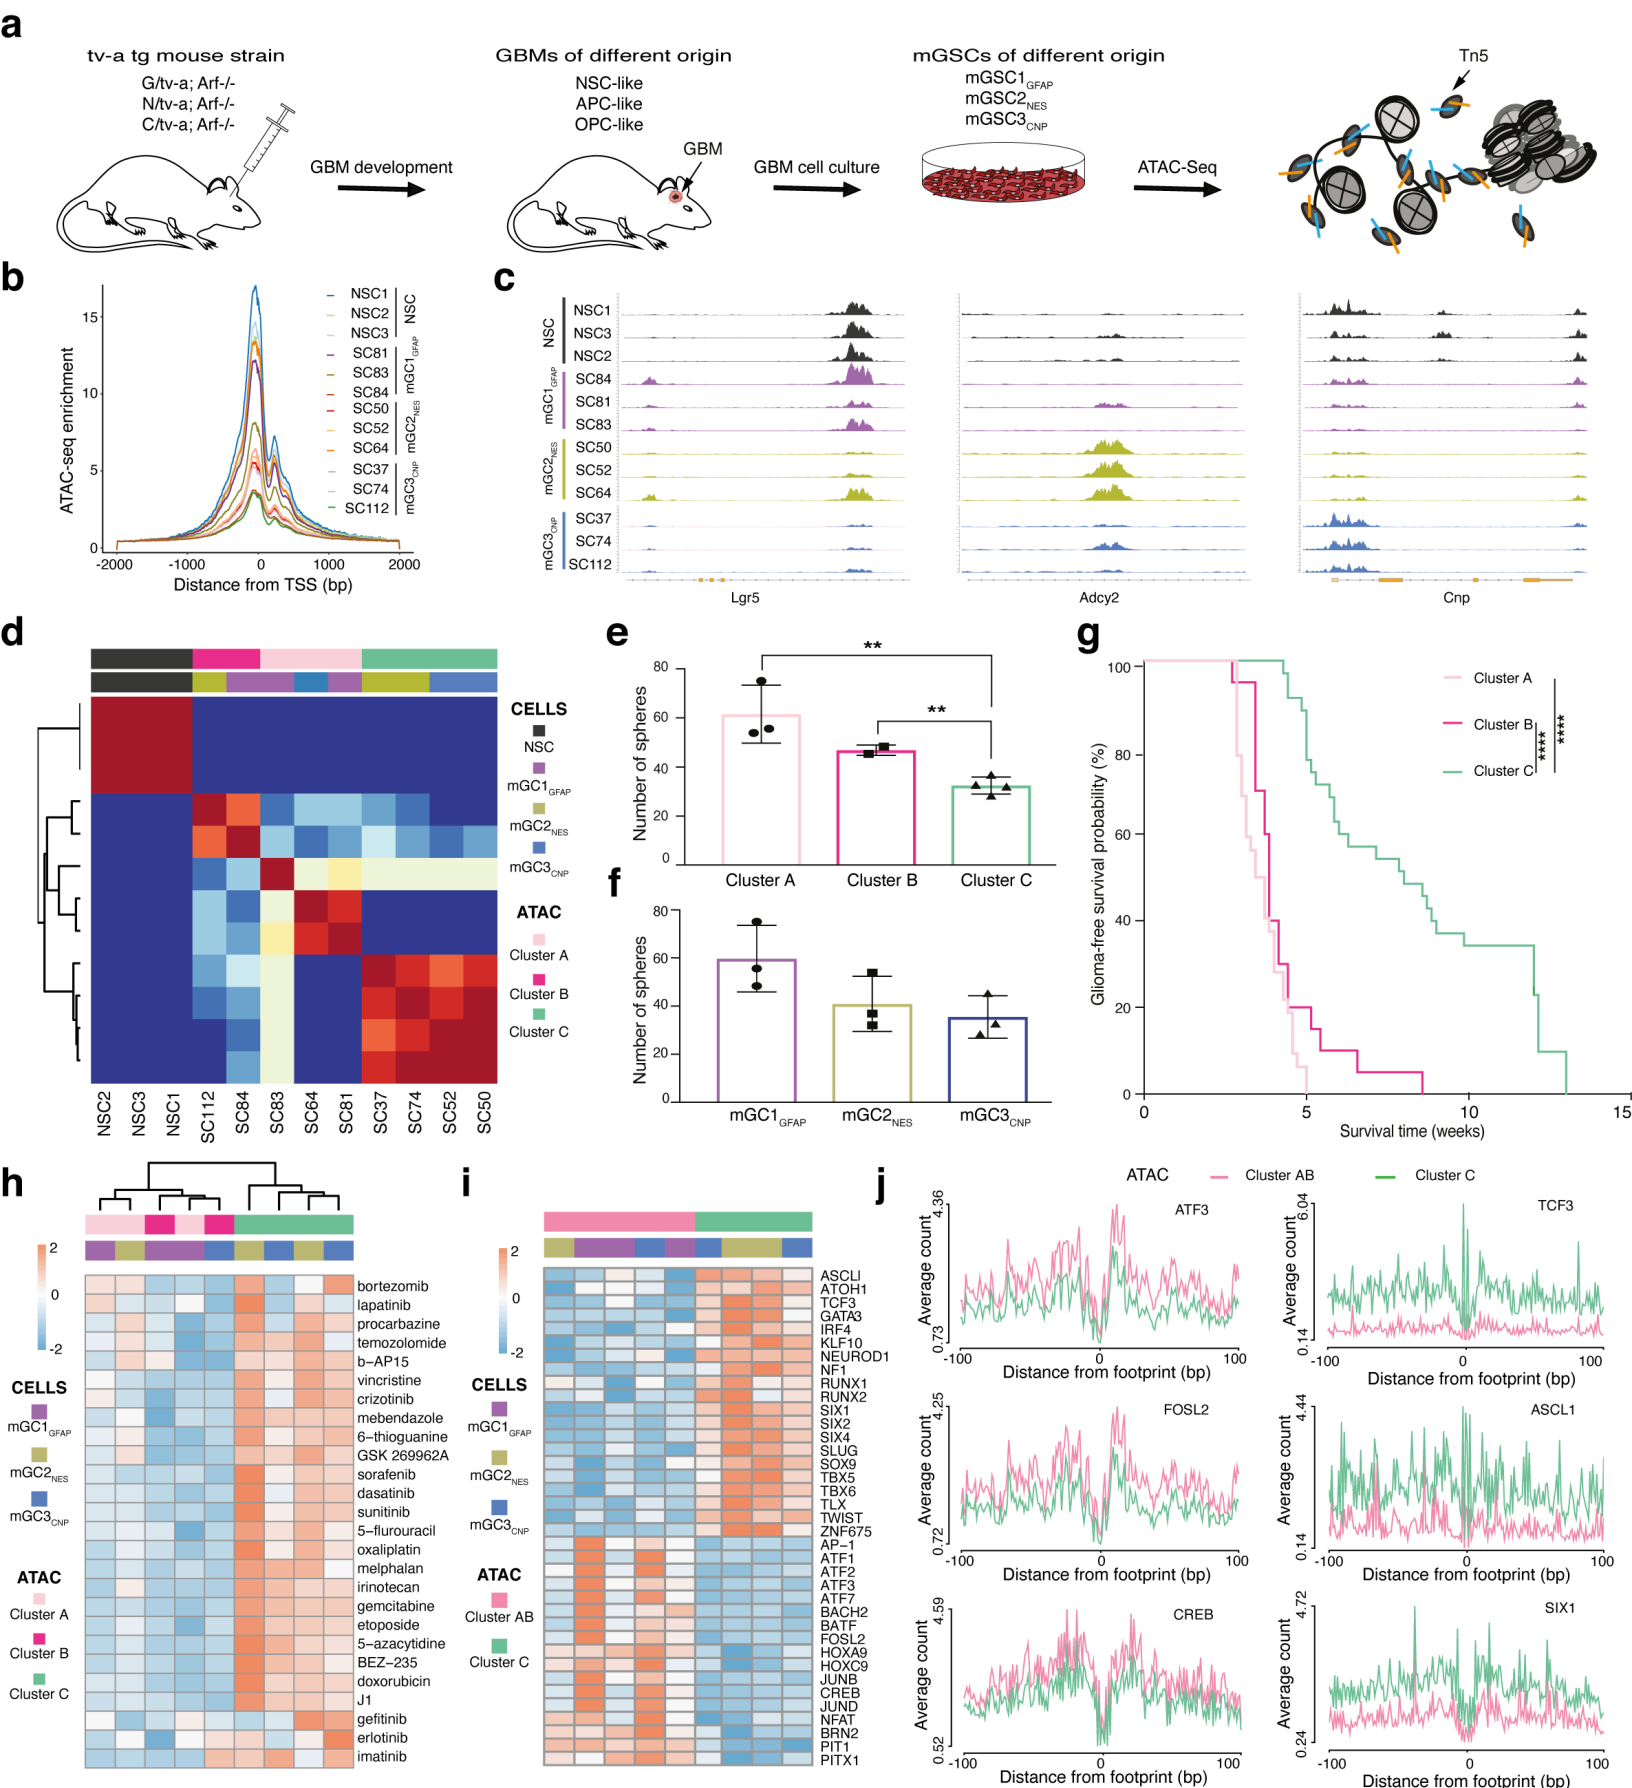

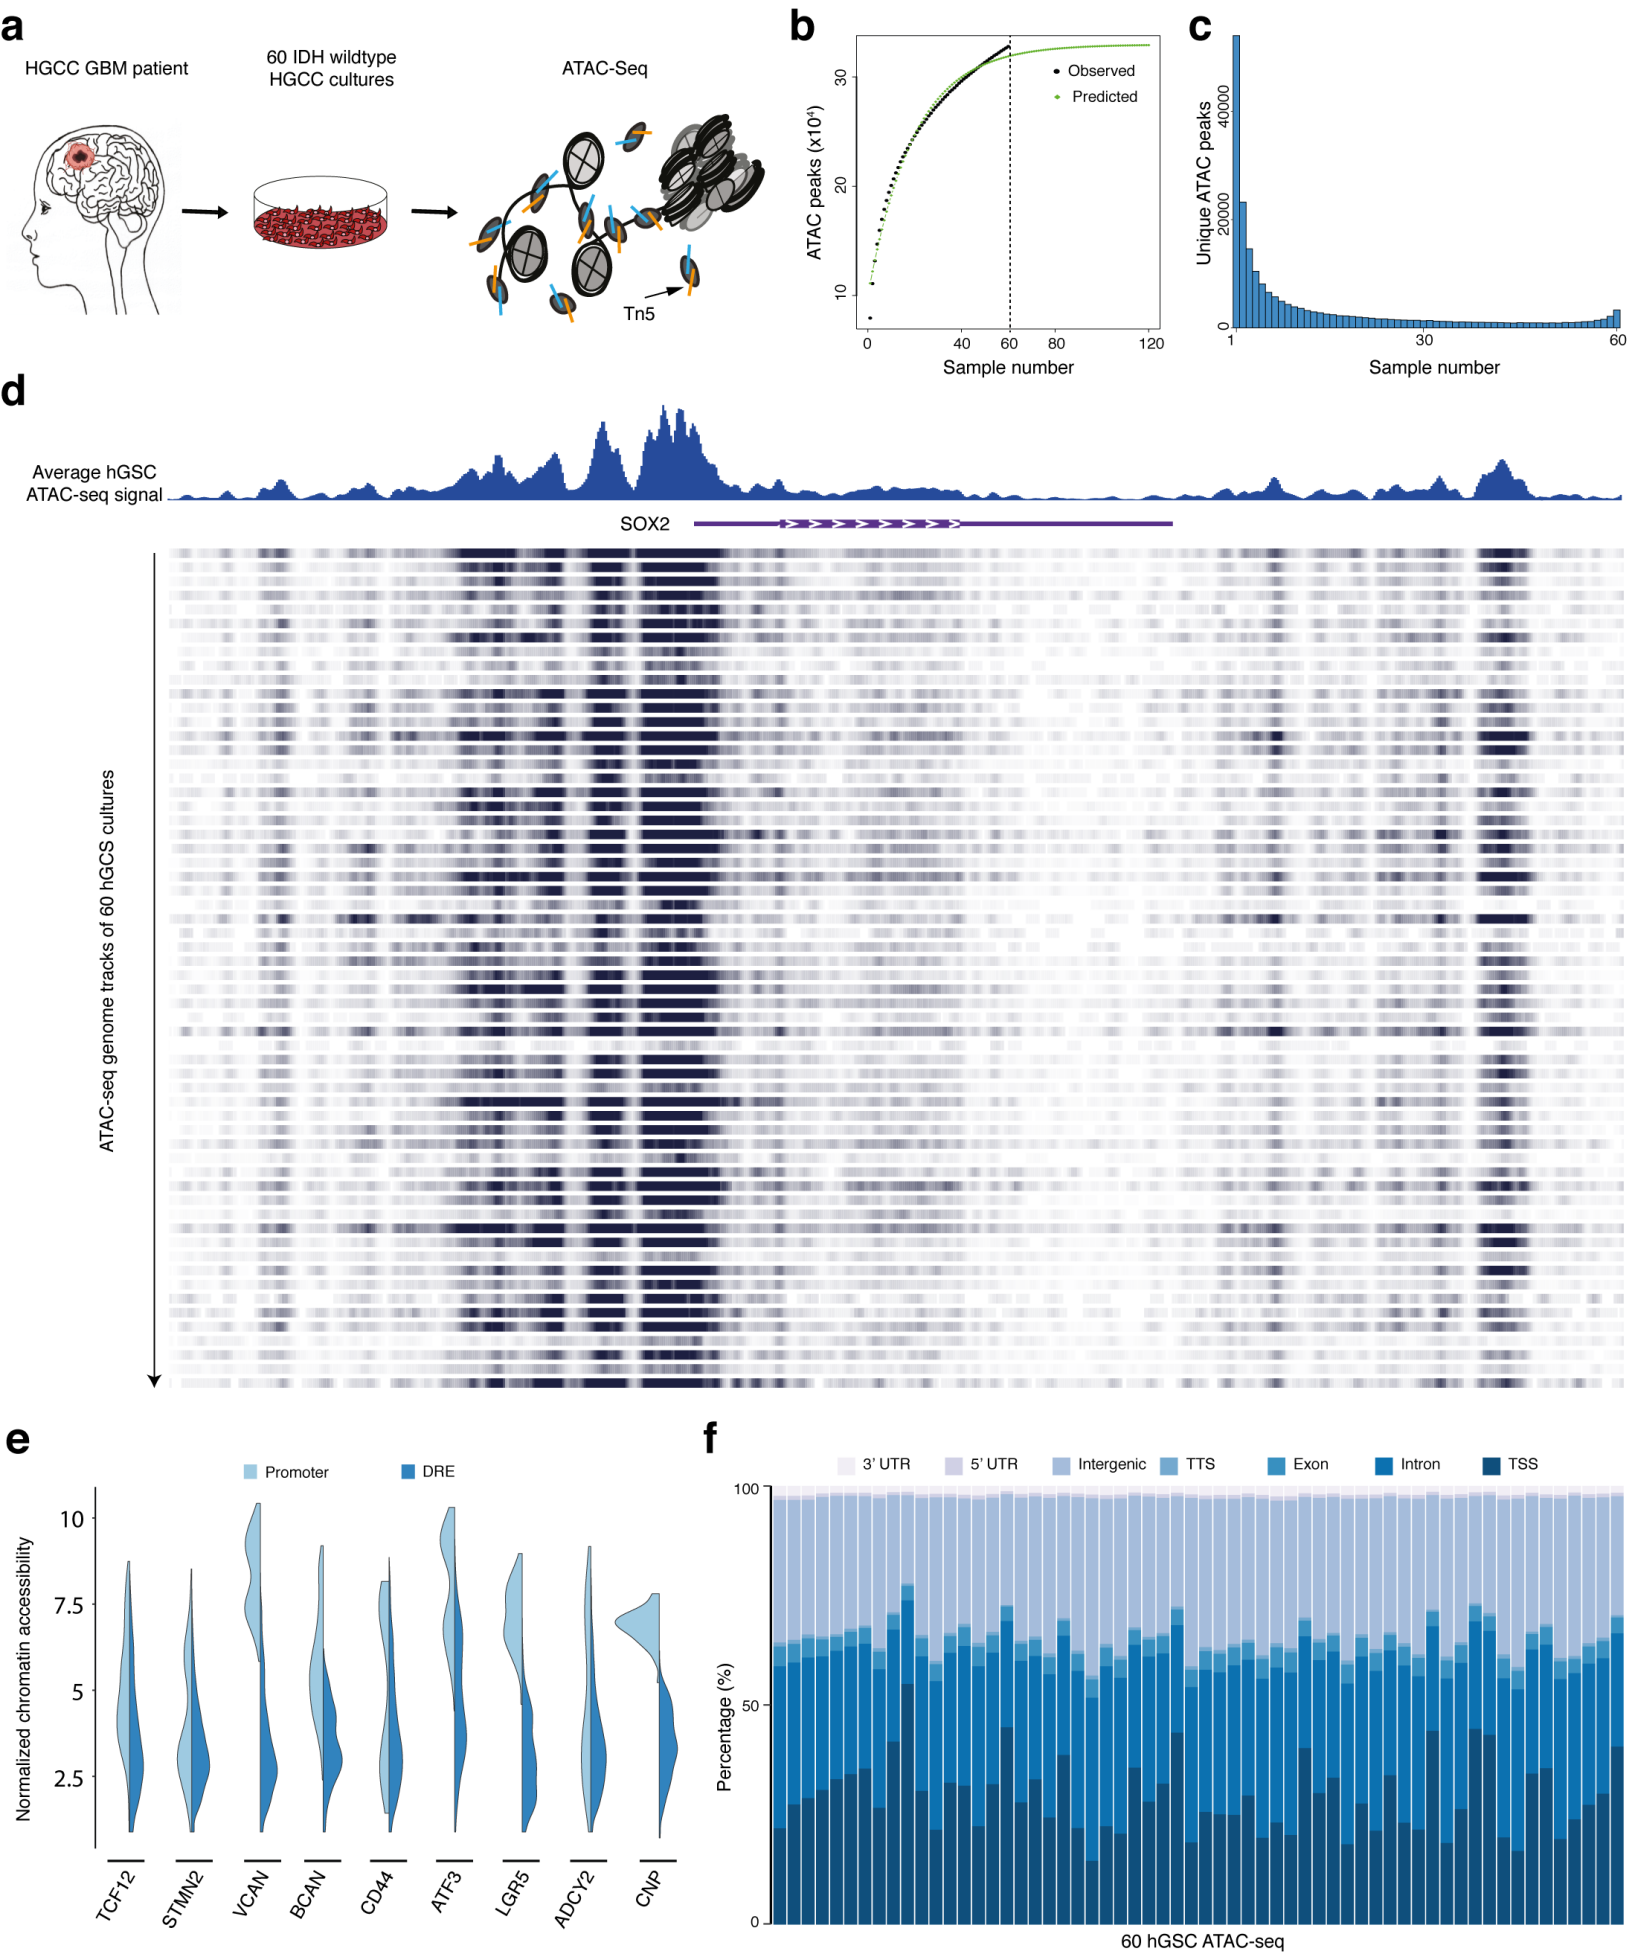

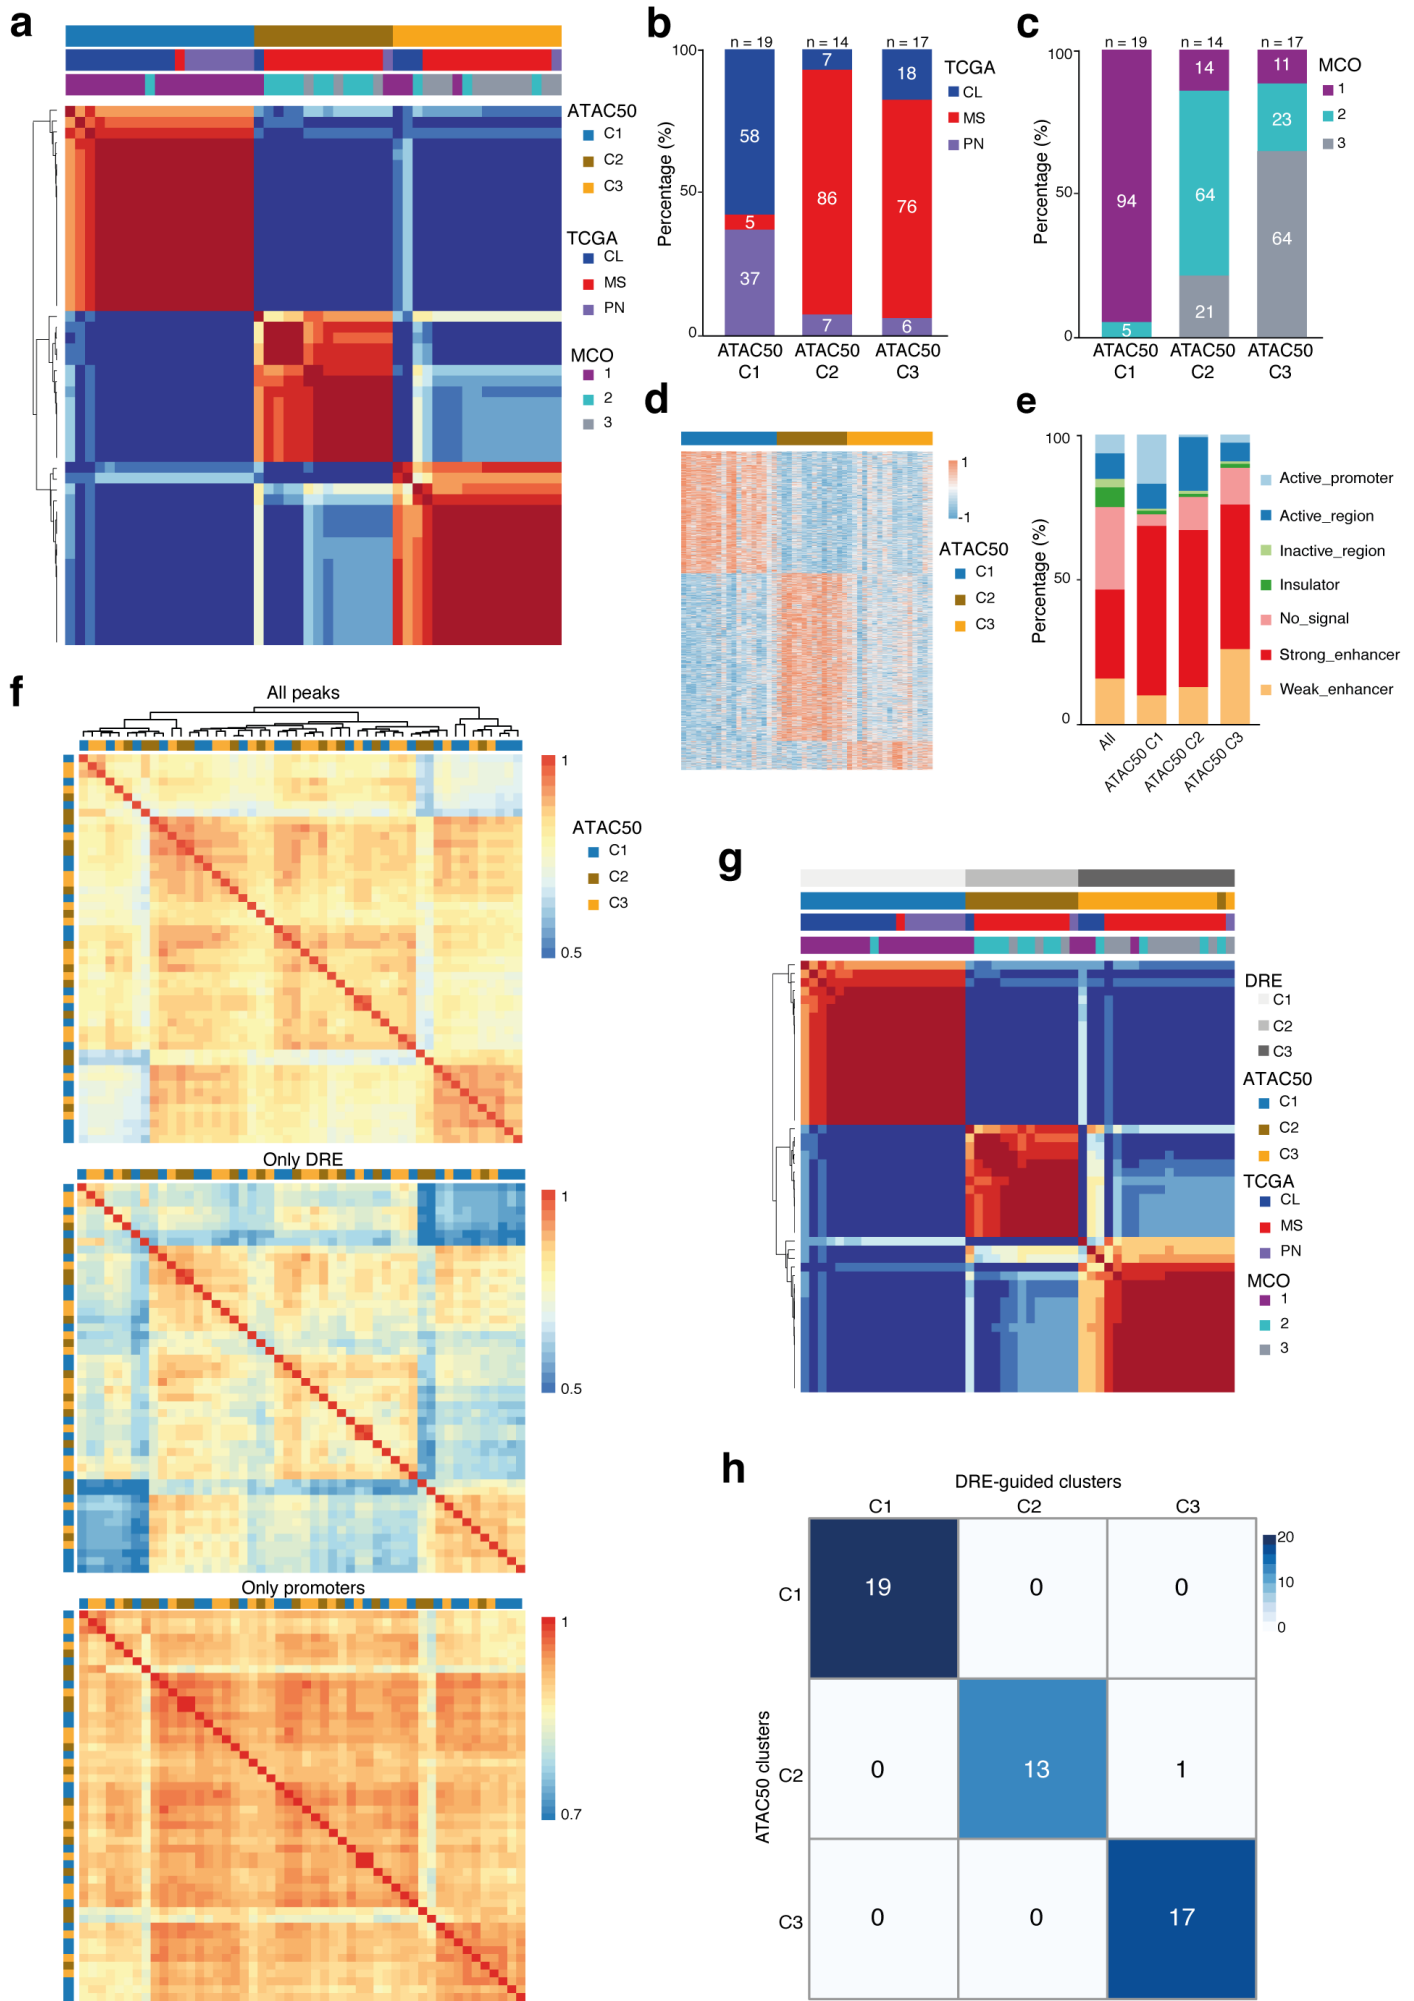

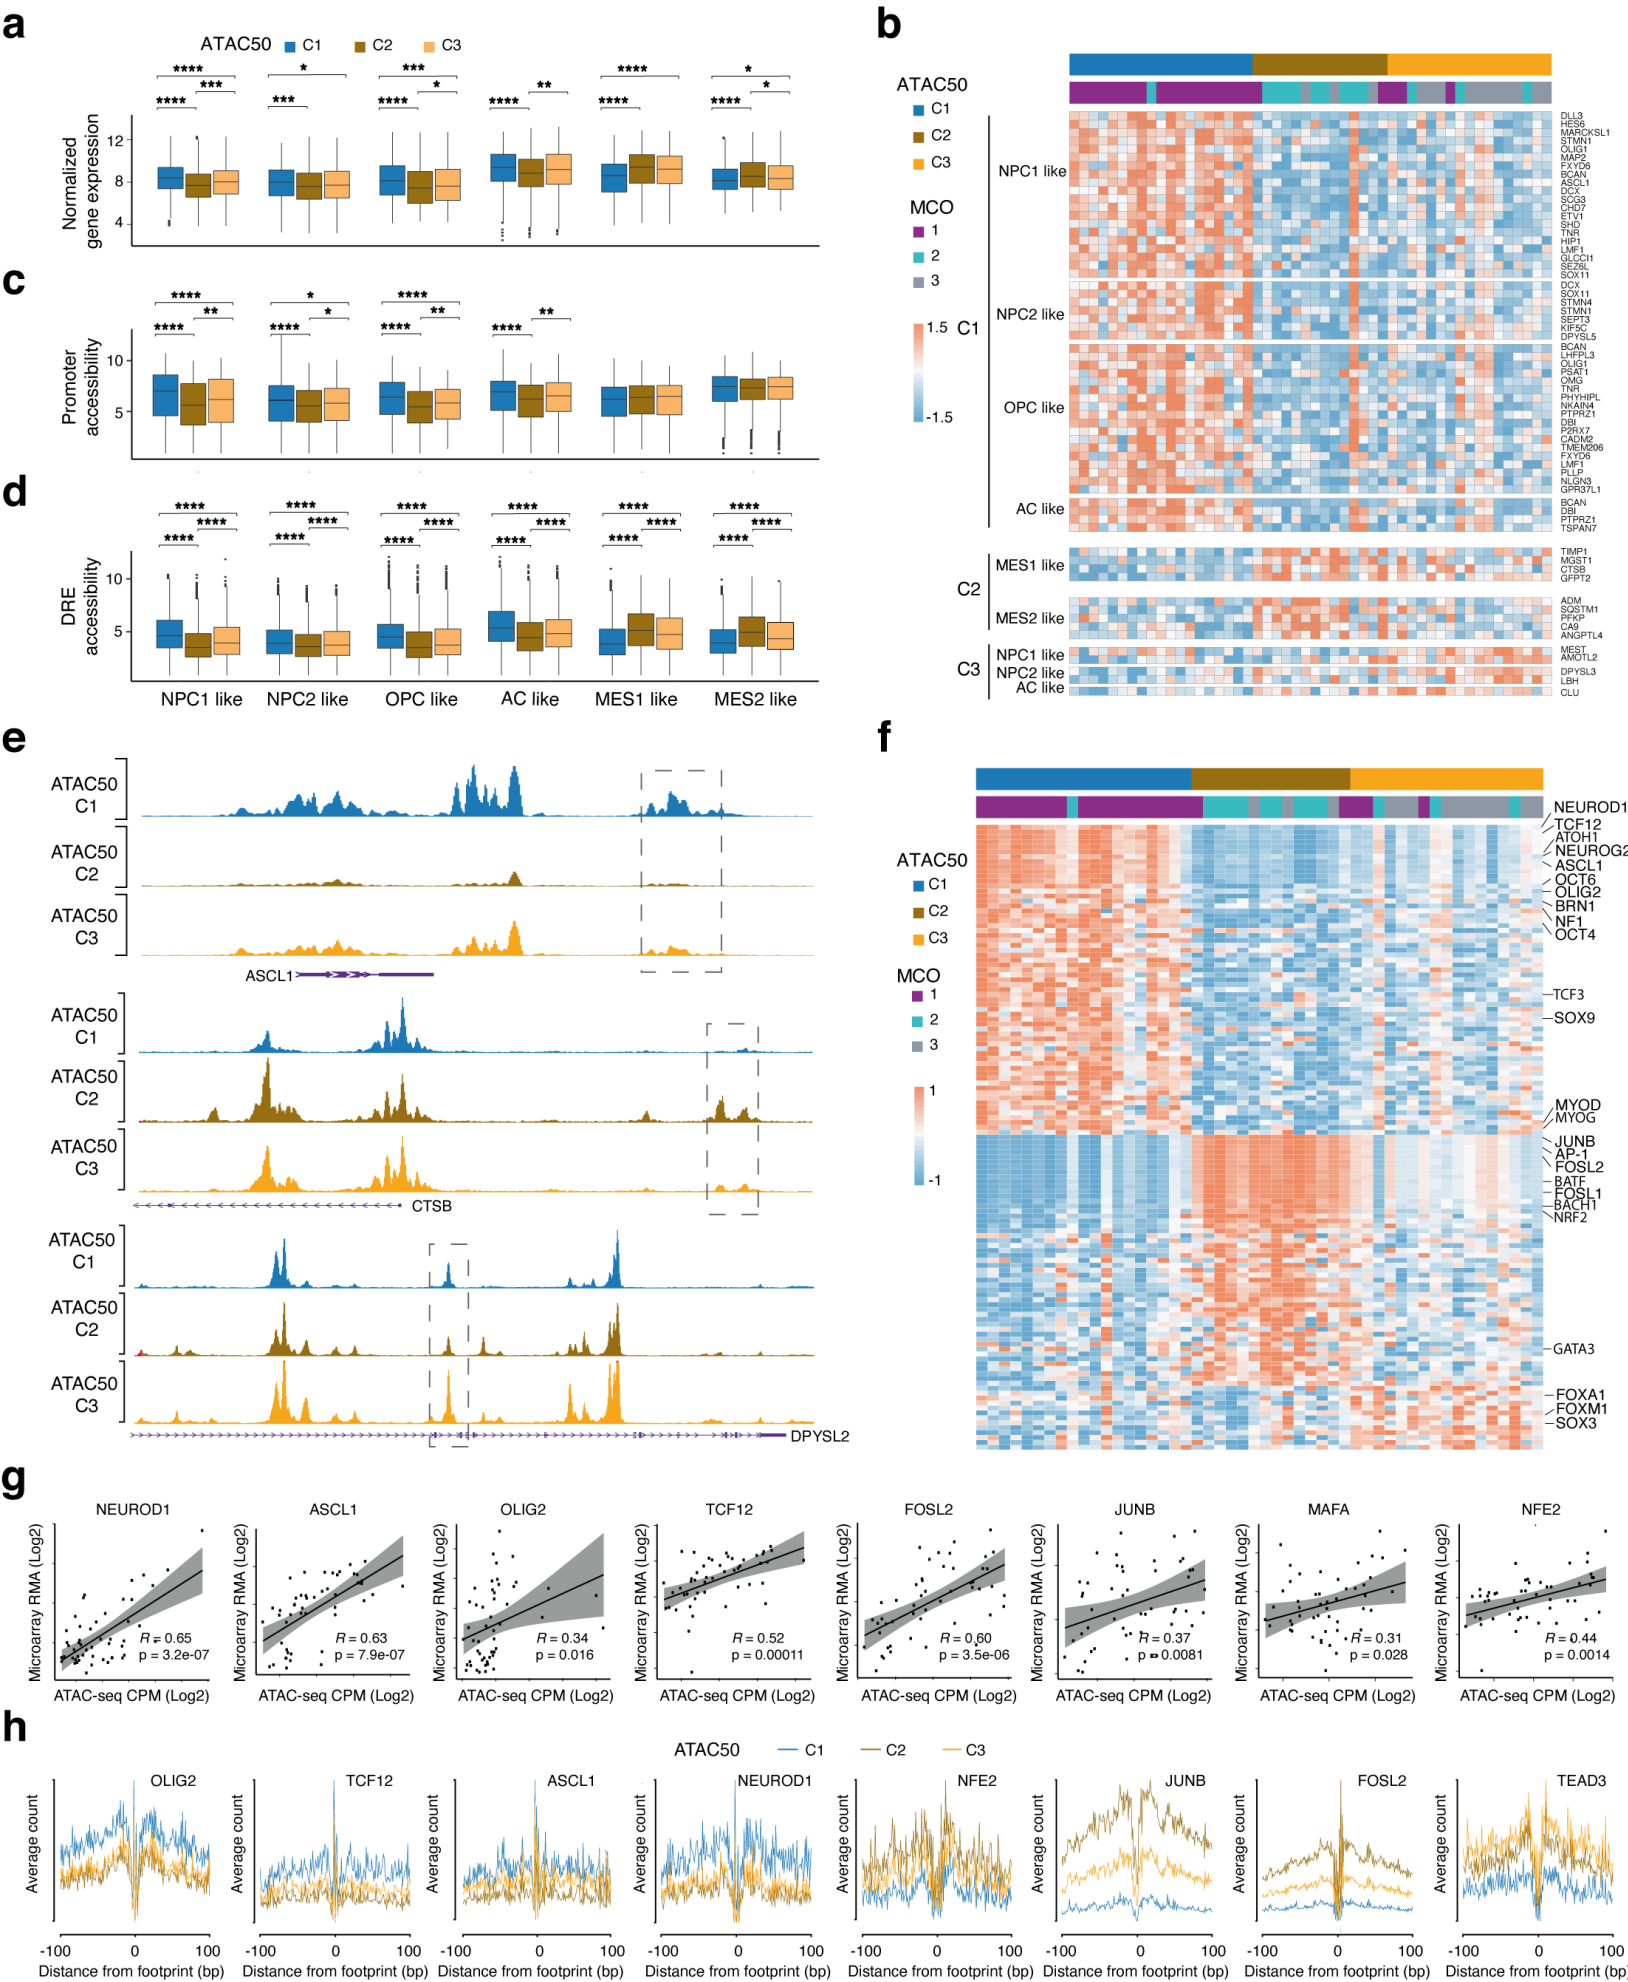

## Figure 5

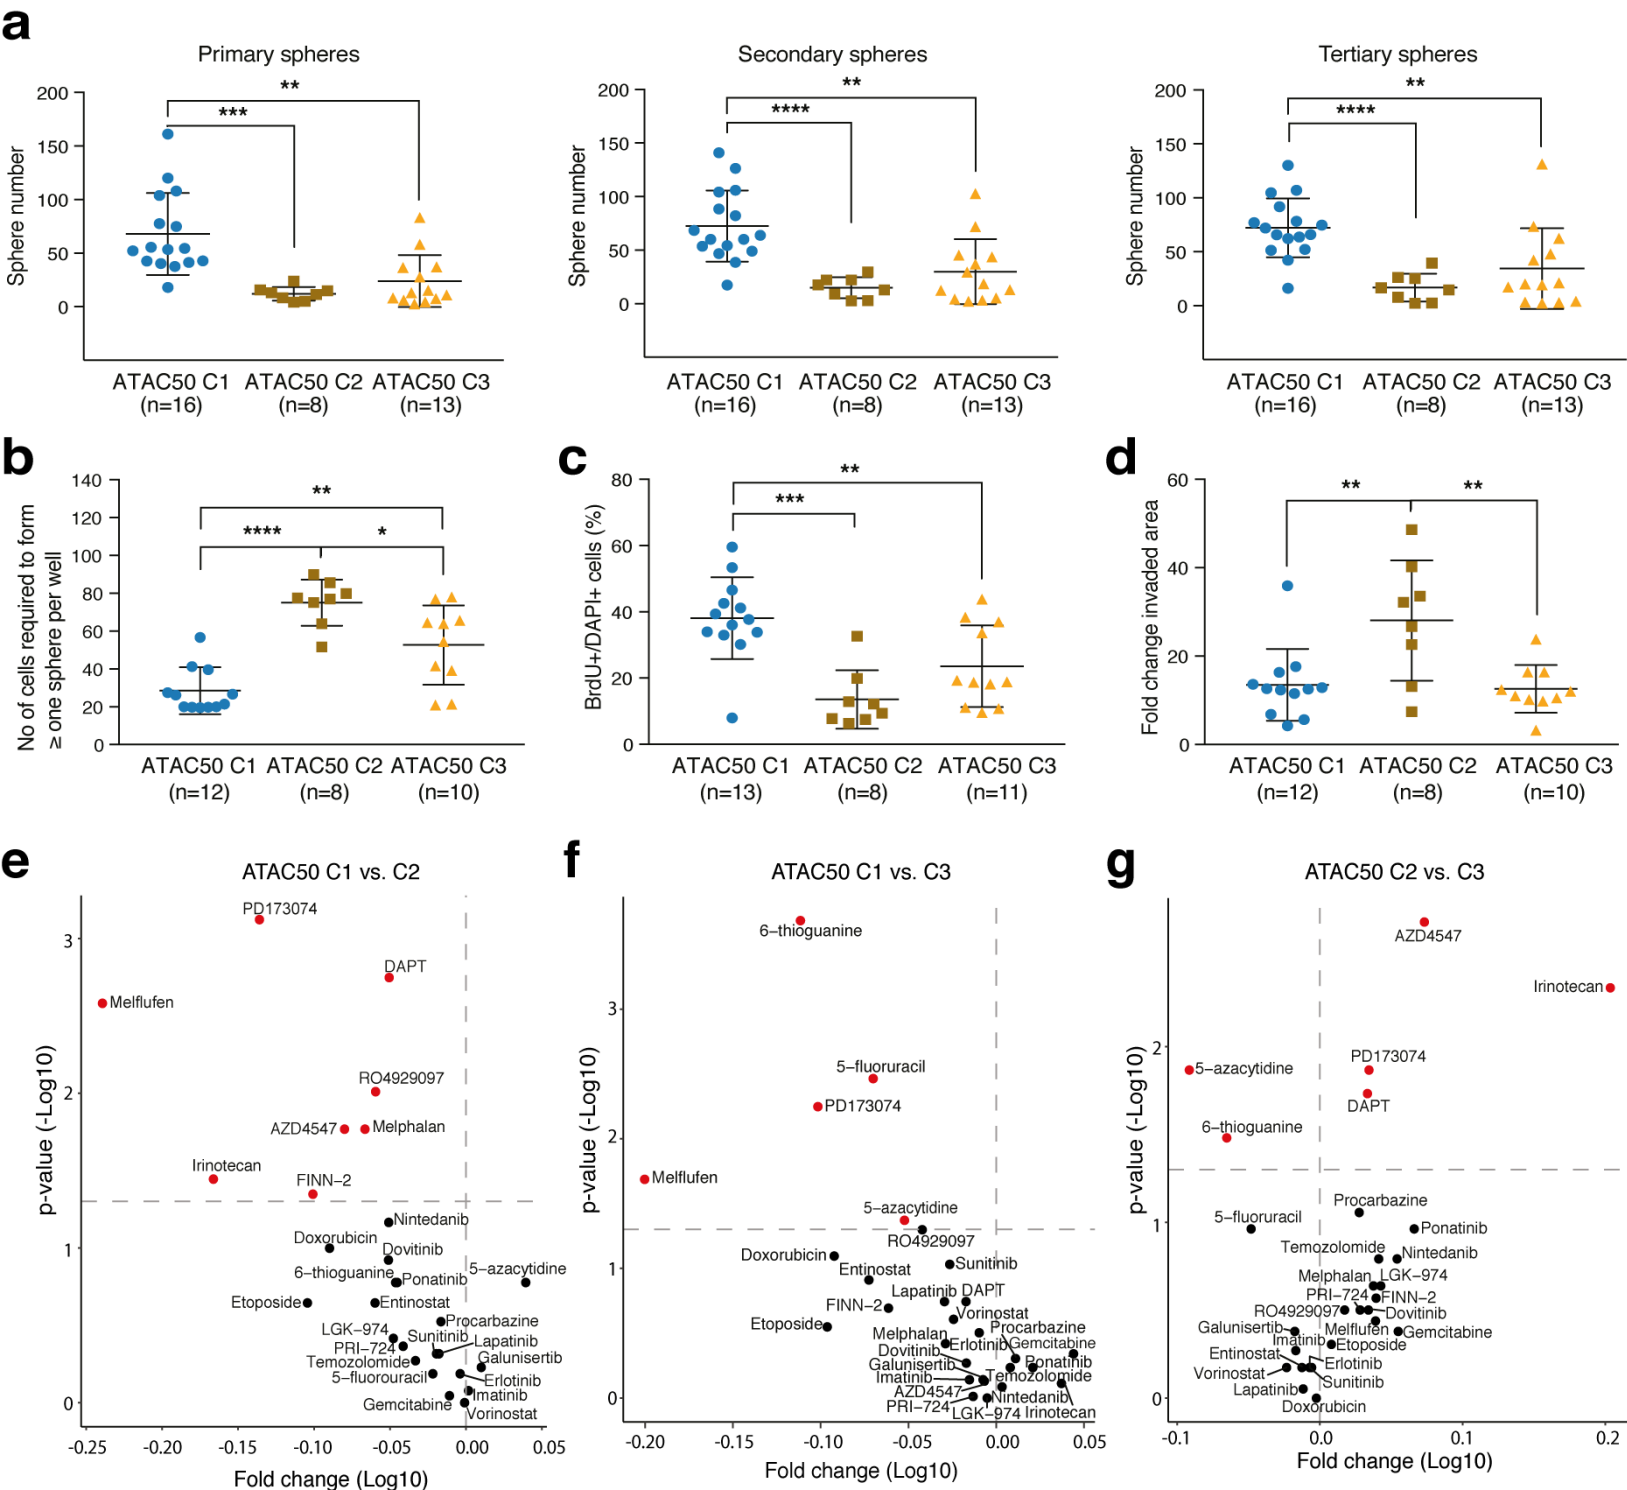

**Figure 6**

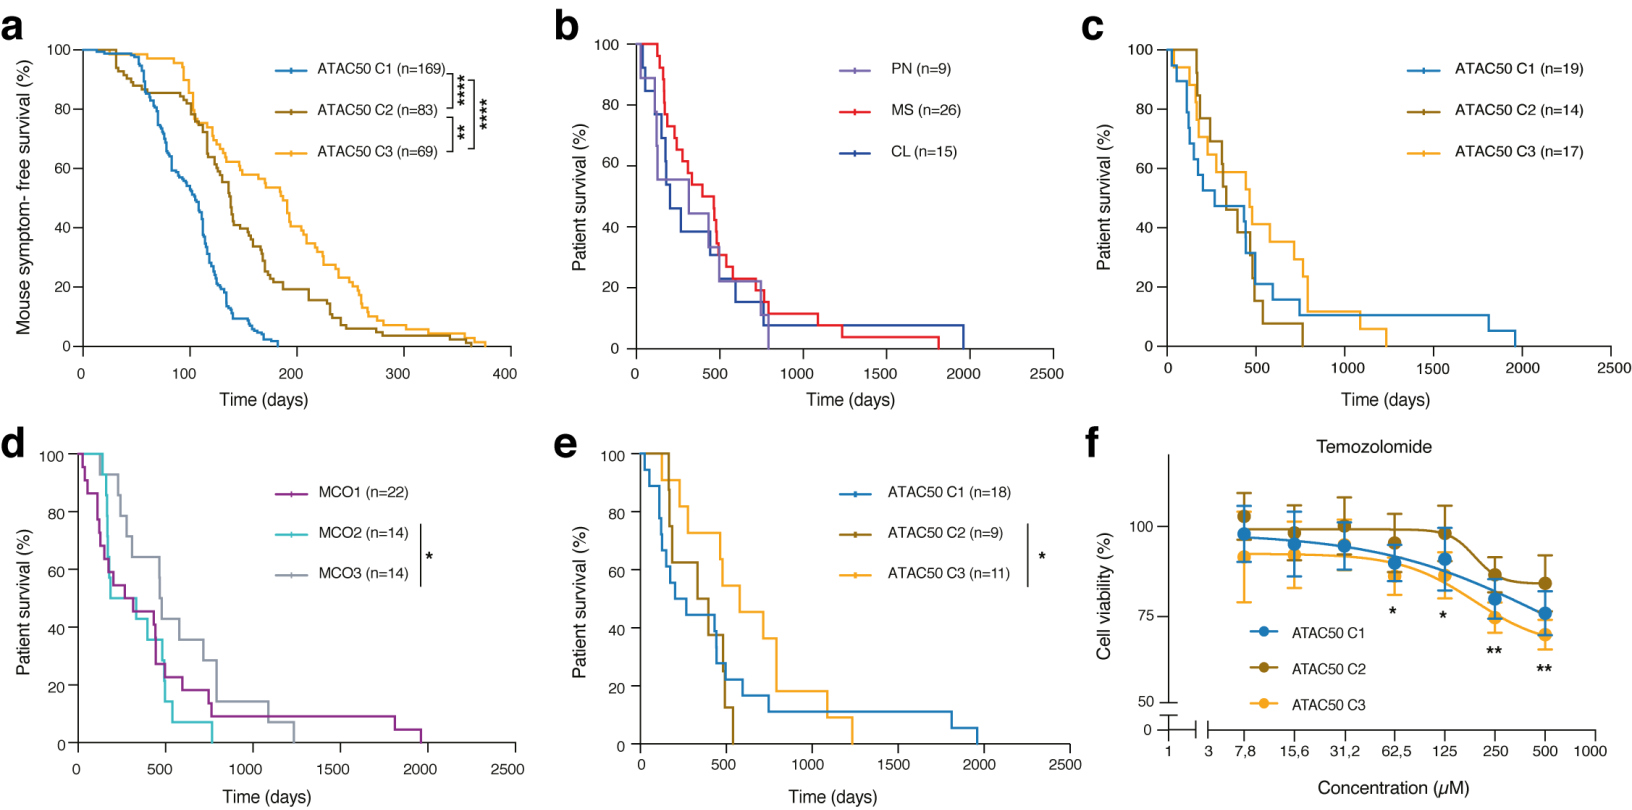



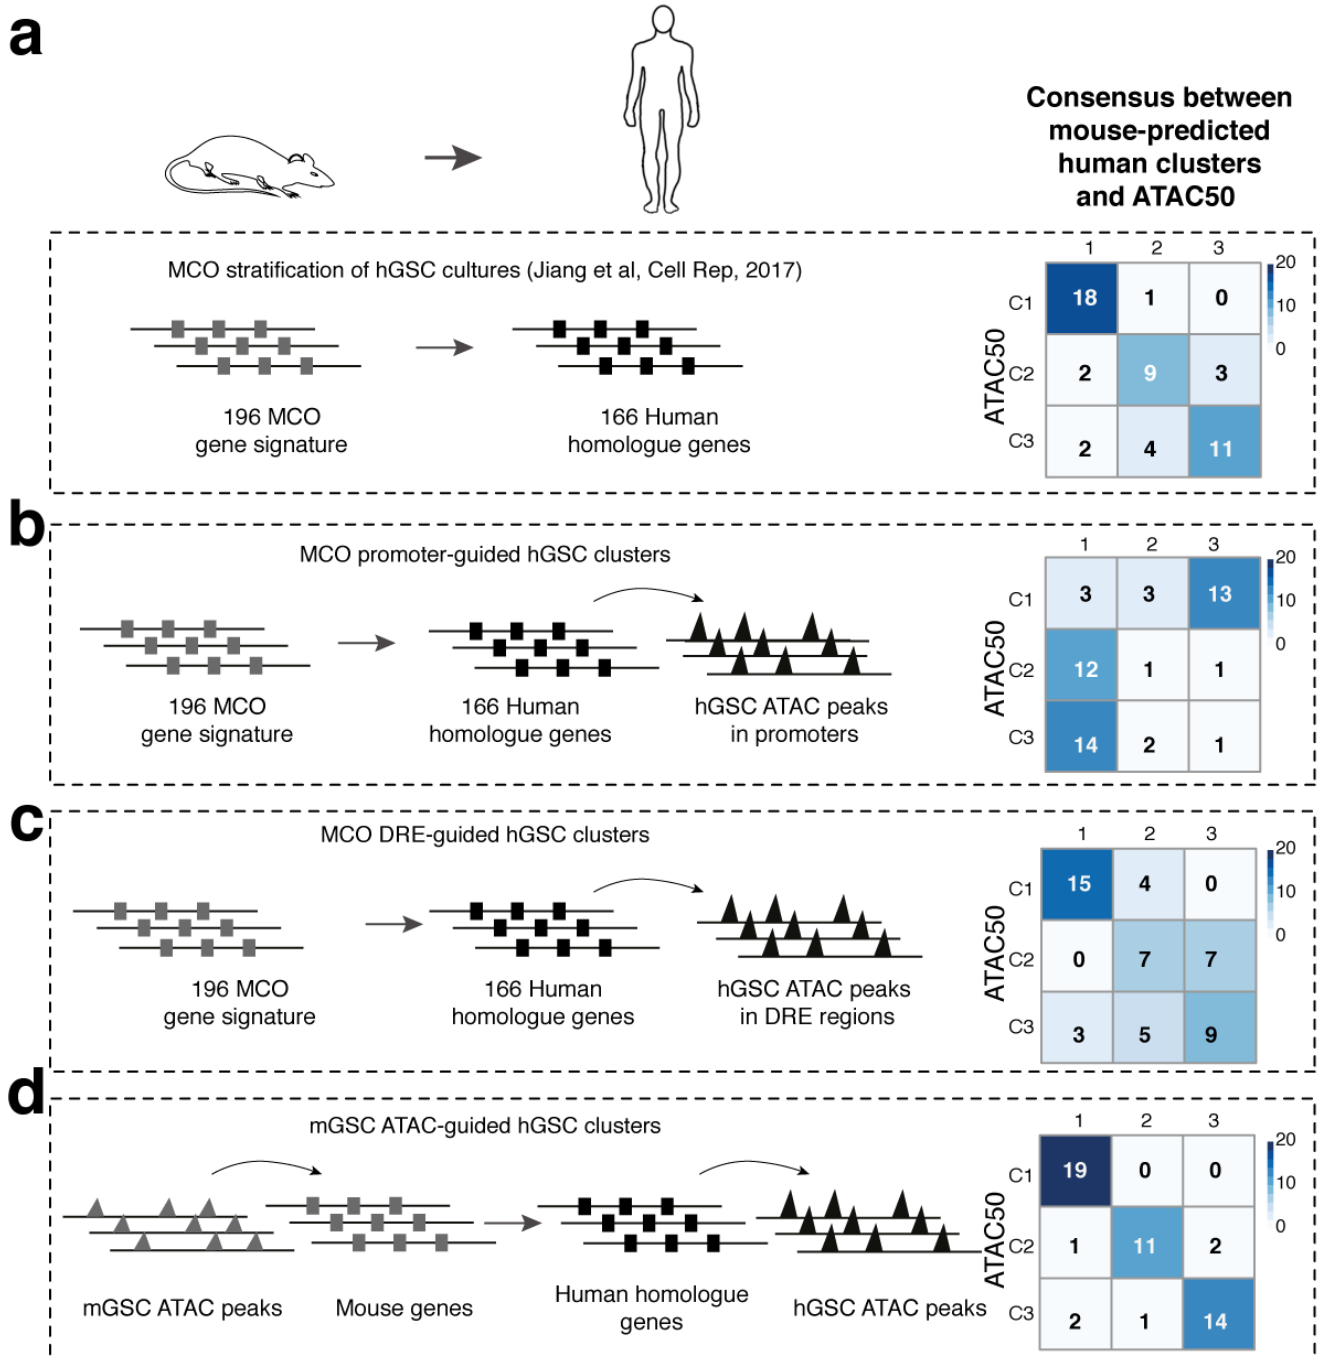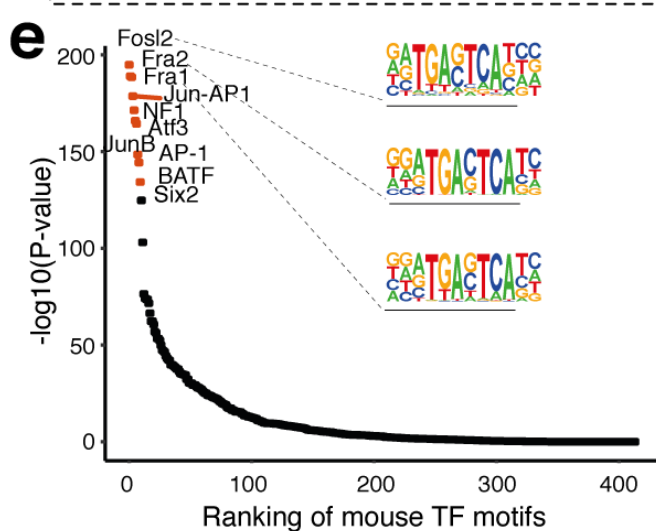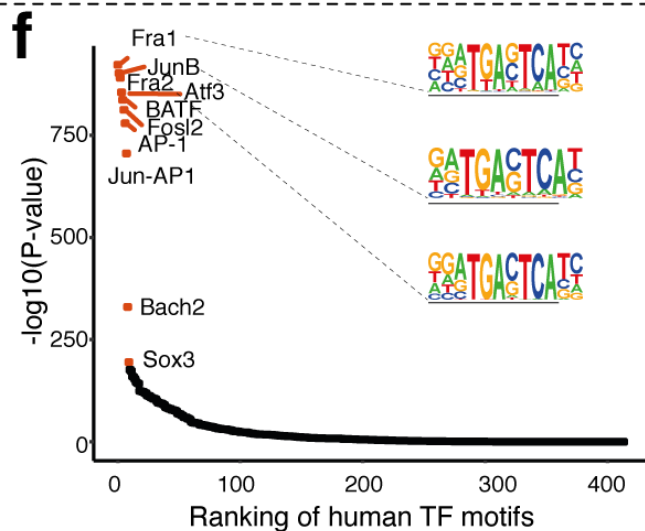

Source: https://www.biorxiv.org/content/10.1101/2021.02.22.431953v1.full.pdf
